# Supplementary material for: An efficient approach to bis-benzoquinonylmethanes on water under catalysis of the bio-derived O-carboxymethyl chitosan
Source: Royal Society of Chemistry journal article supplement (doi:10.1039/c5ra26580k), 2016-01-01

## Supporting Information

### An Efficient approach to Bis-benzoquinonylmethanes On Water Under Catalysis of the Bio-derived *O*-Carboxymethyl Chitosan

Fatereh Asghari-Haji, Kurosh Rad-Moghadam,\* and Nosrat O. Mahmoodi  
*Chemistry department, University of Guilan, Rasht 41335-19141; radmm@guilan.ac.ir*

#### Contents

- S<sub>1</sub>** The <sup>1</sup>H NMR spectrum of *O*-cm-chitosan in D<sub>2</sub>O
- S<sub>2</sub>** The FT-IR spectrum of *O*-cm-chitosan
- S<sub>3</sub>** The X-ray diffraction (XRD) patterns of chitosan and *O*-cm-chitosan
- S<sub>4</sub>** The thermogravimetric analysis (TGA) and differential scanning calorimetry (DSC) of *O*-cm-chitosan
- The scanning electron microscopy (SEM) images of chitosan and *O*-cm-chitosan
- S<sub>5</sub>** The <sup>1</sup>H NMR spectrum of 3,3'-(Phenylmethylene)bis(2-hydroxynaphthalene-1,4-dione) in DMSO-*d*<sub>6</sub> (**3a**)
- S<sub>6</sub>** The <sup>1</sup>H NMR spectrum of 3,3'-((4-Chlorophenyl)methylene)bis(2-hydroxynaphthalene-1,4-dione) in DMSO-*d*<sub>6</sub> (**3b**)
- S<sub>7</sub>** The <sup>1</sup>H NMR spectrum of 3,3'-((4-Hydroxyphenyl)methylene)bis(2-hydroxynaphthalene-1,4-dione) in DMSO-*d*<sub>6</sub> (**3c**)
- S<sub>8</sub>** The <sup>1</sup>H NMR spectrum of 3,3'-((3-Methoxyphenyl)methylene)bis(2-hydroxynaphthalene-1,4-dione) in DMSO-*d*<sub>6</sub> (**3d**)
- S<sub>9</sub>** The <sup>1</sup>H NMR spectrum of 3,3'-((4-Nitrophenyl)methylene)bis(2-hydroxynaphthalene-1,4-dione) in DMSO-*d*<sub>6</sub> (**3e**)
- S<sub>10</sub>** The <sup>1</sup>H NMR spectrum of 3,3'-((4-Methylphenyl)methylene)bis(2-hydroxynaphthalene-1,4-dione) in DMSO-*d*<sub>6</sub> (**3f**)
- S<sub>11</sub>** The <sup>1</sup>H NMR spectrum of 3,3'-((3-Bromophenyl)methylene)bis(2-hydroxynaphthalene-1,4-dione) in DMSO-*d*<sub>6</sub> (**3g**)
- S<sub>12</sub>** The <sup>1</sup>H NMR spectrum of 3,3'-((4-Methoxyphenyl)methylene)bis(2-hydroxynaphthalene-1,4-dione) in DMSO-*d*<sub>6</sub> (**3h**)

S<sub>1</sub> The <sup>1</sup>H NMR spectrum of *O*-cm-chitosan in D<sub>2</sub>O

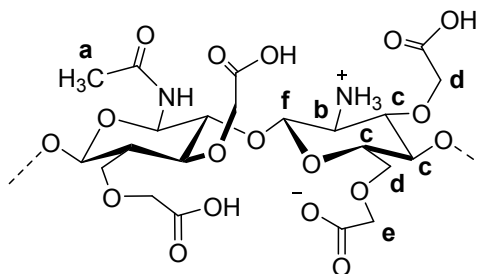

\*The CH peak of **f** is overlapping with the solvent HOD signal at 4.72.

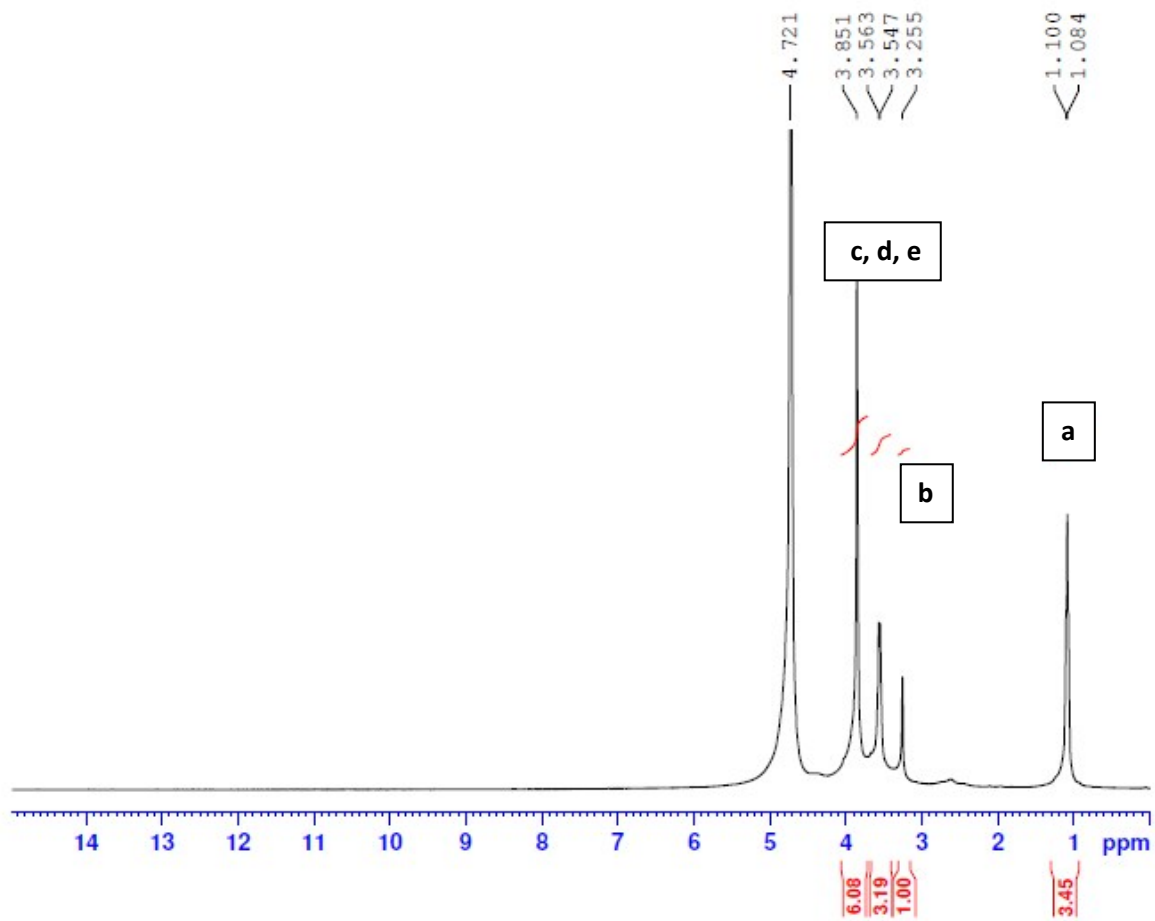

Sample code: I (haji)

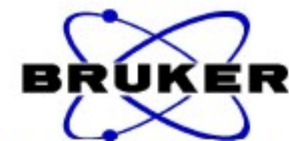

NAME Gilan UN  
EXPNO 1773  
PROCNO 1  
Date\_ 20150125  
Time 15.13  
INSTRUM spect  
PROBHD 5 mm PABBO BB-  
PULPROG zg30  
TD 65536  
SOLVENT D2O  
NS 20  
DS 0  
SWH 8012.820 Hz  
FIDRES 0.122266 Hz  
AQ 4.0894966 sec  
RG 36  
DW 62.400 usec  
DE 6.50 usec  
TE 293.5 K  
D1 4.0000000 sec  
TDO 1

==== CHANNEL f1 =====  
NUC1 1H  
P1 14.00 usec  
PL1 -2.00 dB  
PL1W 11.86359406 W  
SFO1 400.2236020 MHz  
SI 32768  
SF 400.2200000 MHz  
WDW EM  
SSB 0  
LB 0.30 Hz  
GB 0  
PC 1.00

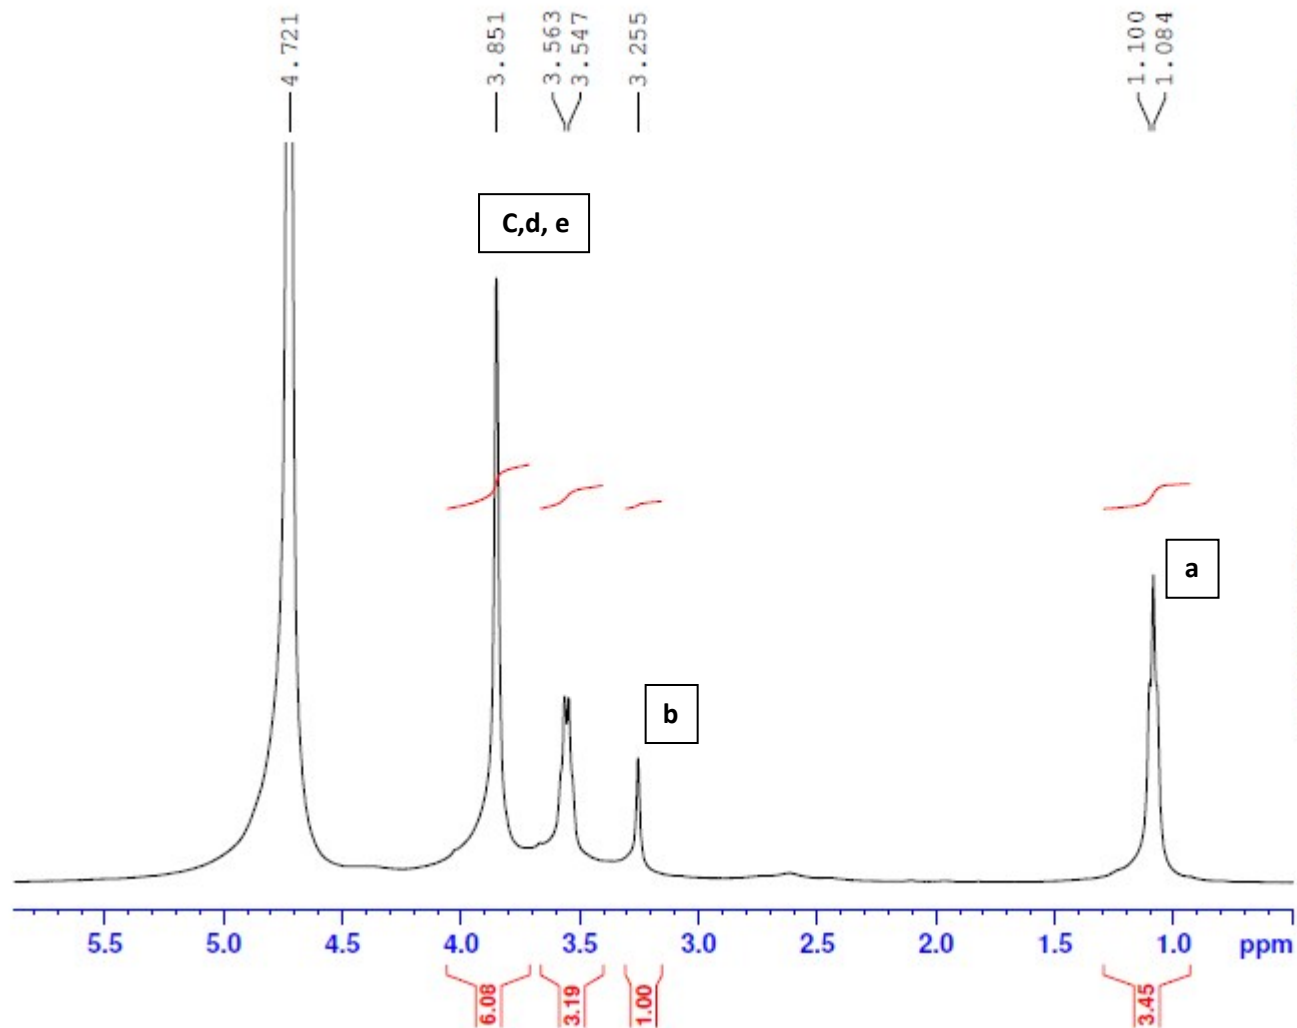

S<sub>2</sub> The FT-IR spectrum of fresh and recovered *O*-cm-chitosan

The FT-IR spectrum shows the basic characteristic absorptions at: 3424 cm<sup>-1</sup> (O–H stretch.), 2927 cm<sup>-1</sup> (C–H stretch.), 1598 cm<sup>-1</sup> (N–H bend), 1727 cm<sup>-1</sup> (–COOH), 1076–1143 cm<sup>-1</sup> (–C–O stretch.).

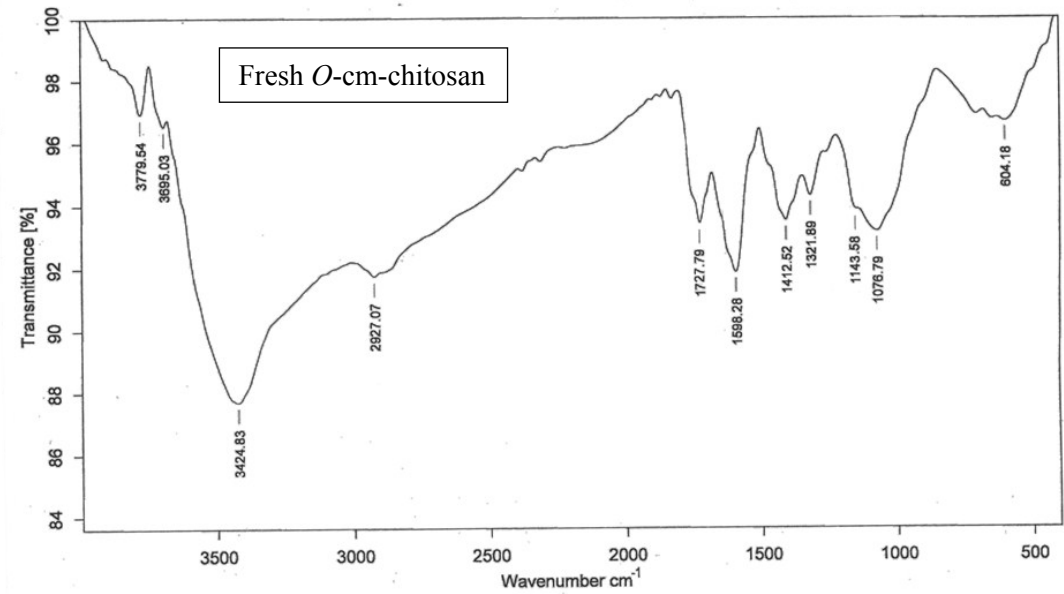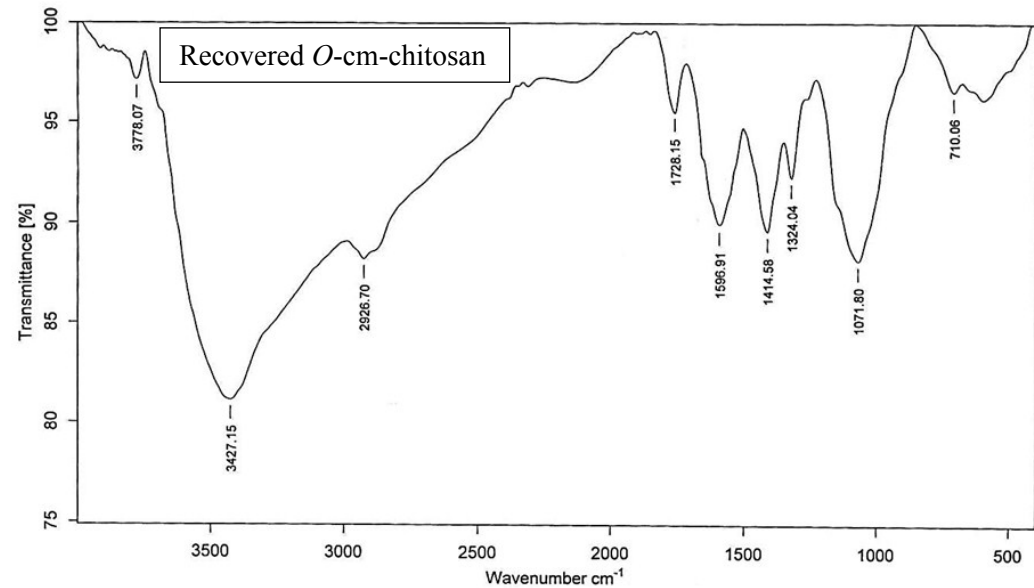

S<sub>3</sub> The X-ray diffraction (XRD) patterns of chitosan and *O*-cm-chitosan

The XRD of original chitosan displays two characteristic peaks at  $2\theta = 10^\circ$  (weak diffraction peak) and  $2\theta = 20^\circ$  (strong diffraction peak) indicating a considerably high degree of crystallinity for chitosan. However, as the XRD of *O*-cm-chitosan shows, much (but not all) of the crystallinity was lost on *O*-carboxymethylation of chitosan. Therefore, the synthesized *O*-cm-chitosan is rather an amorphous bio-derived polymer, very likely due to a large change in intermolecular hydrogen bonding between the individual chains of chitosan on *O*-carboxymethylation.

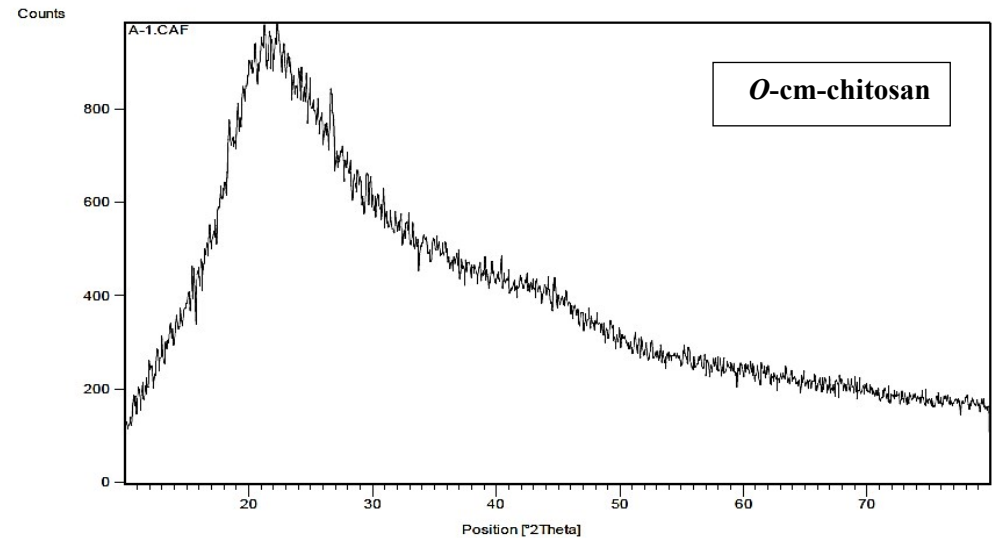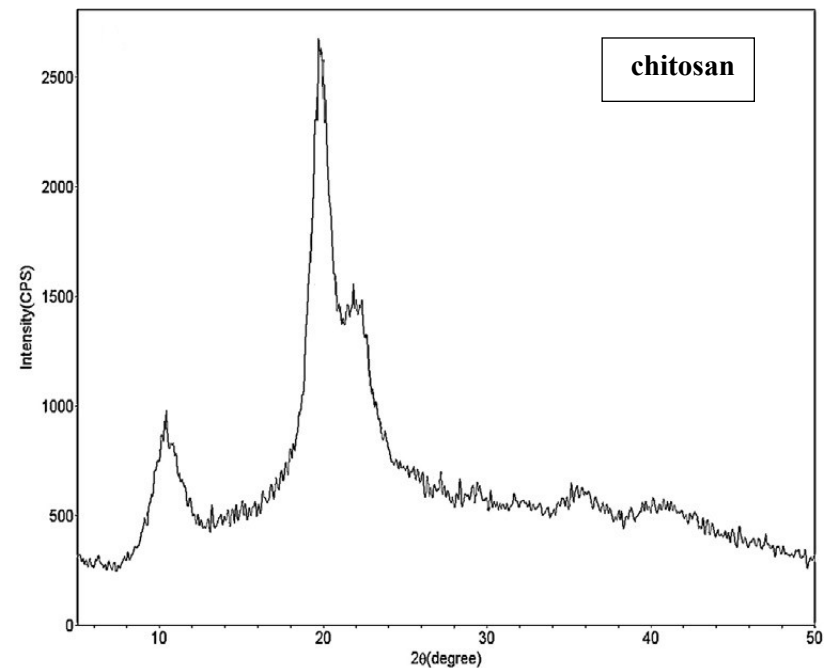

#### S<sub>4</sub> The TGA & DSC thermograms of *O*-cm-chitosan

The TGA and DSC traces of *O*-cm-chitosan display a smooth endothermic weight loss at 60–274 °C, presumably due to dehydration and decarboxylation of *O*-cm-chitosan. The large weight loss at 296 °C in the TGA thermogram of *O*-cm-chitosan corresponds to a strong exothermic decomposition peak in the DSC trace of this compound. In an earlier study, the maximum thermal decomposition temperature of chitosan was reported to be 302 °C which is slightly greater than the value of 296 °C determined by the present study for *O*-cm-chitosan.<sup>26</sup> The lower thermal stability of *O*-cm-chitosan with respect to that of chitosan can be attributed to the less crystallinity and presence of carboxyl groups in this compound.

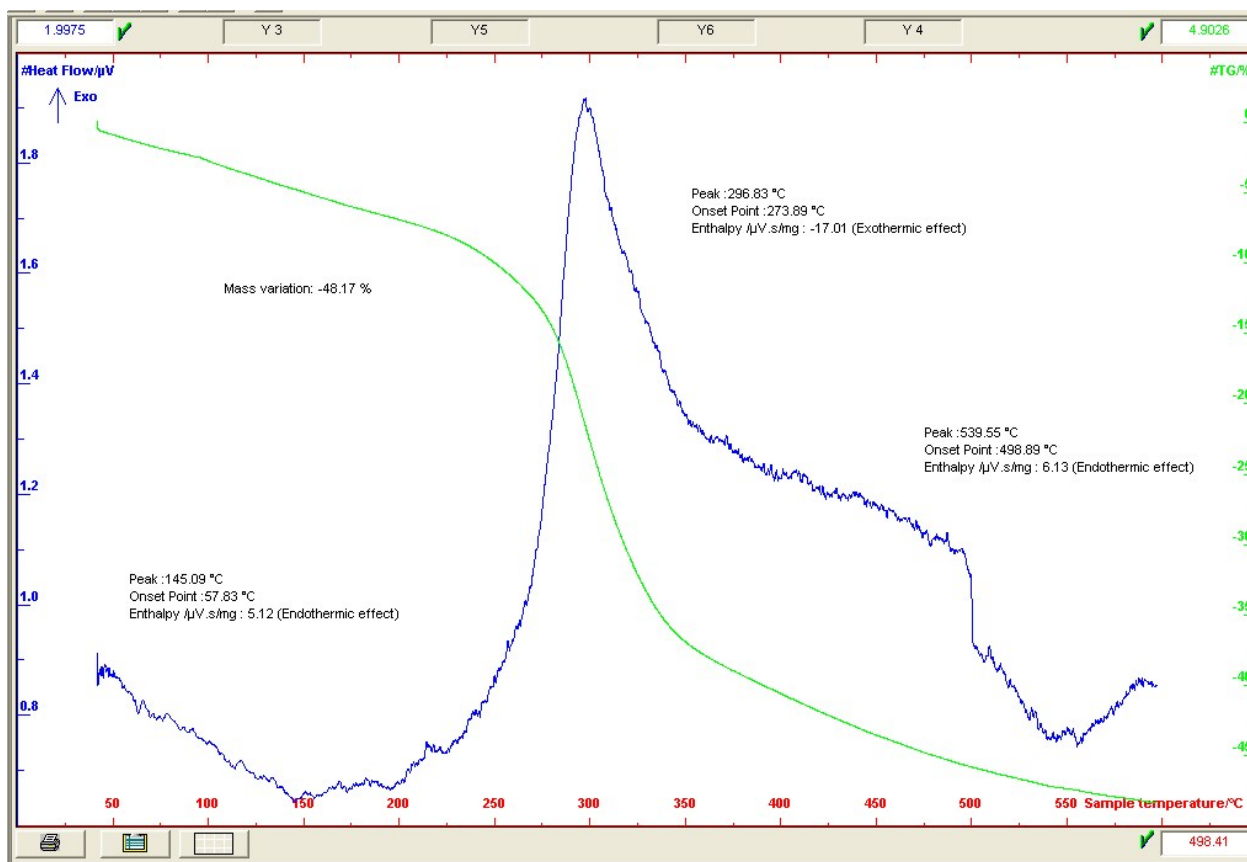

S<sub>5</sub> The scanning electron microscopy (SEM) images of chitosan and *O*-cm-chitosan

The SEM images showed a smooth surface morphology for chitosan (A1, A2, A3) before being carboxymethylated. Upon *O*-carboxymethylation (B1, B2, B3), the surface of chitosan was completely changed, indicating that the desired modification was achieved.

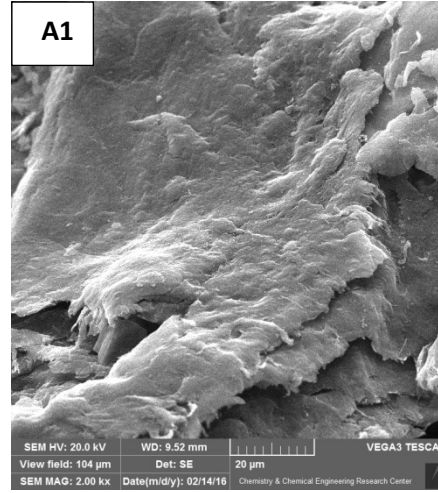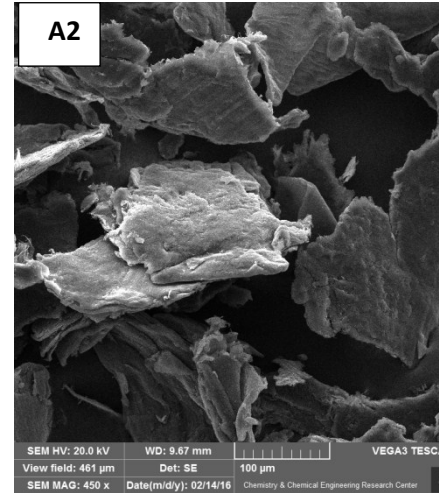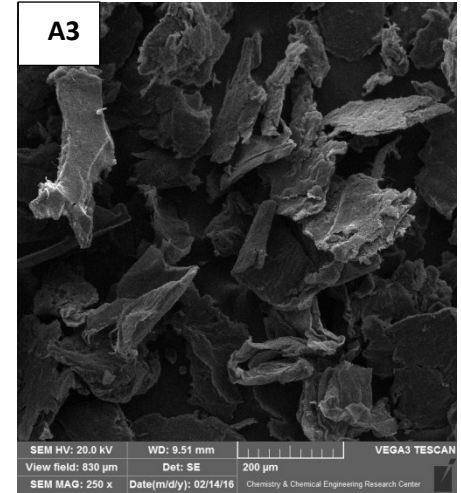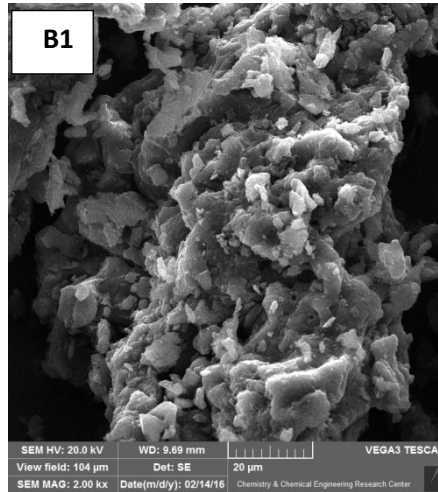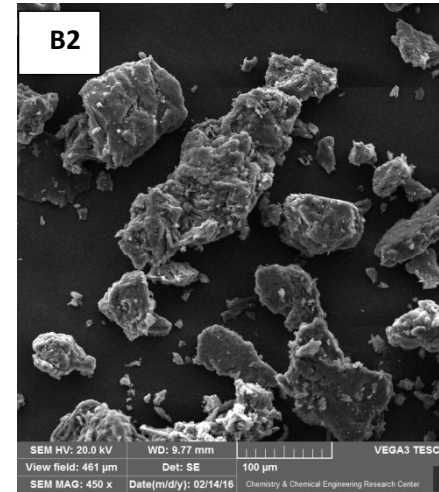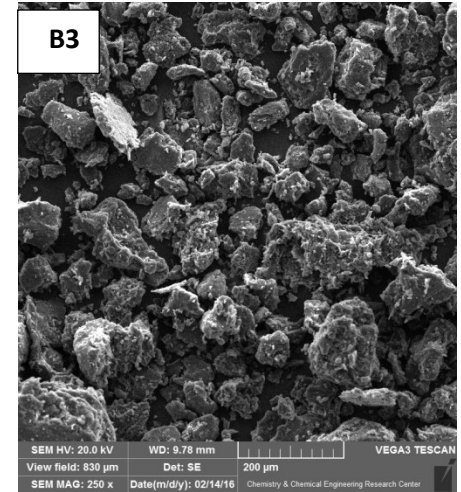

S<sub>6</sub> The <sup>1</sup>H NMR spectrum of 3,3'-(phenylmethylene)bis(2-hydroxynaphthalene-1,4-dione) in DMSO-*d*<sub>6</sub> (**3a**)

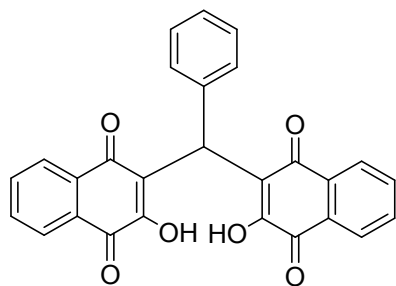

<sup>1</sup>H NMR (500 MHz, DMSO-*d*<sub>6</sub>): δ<sub>H</sub> 7.91 (d, *J* 6.7 Hz, 2H), 7.83 (d, *J* 6.3 Hz, 2H), 7.71 (br t, 2H), 7.62 (br t, 2H), 7.10-7.01 (m, 7H, Ph), 6.64 (1H, s, Aliph. CH) ppm.

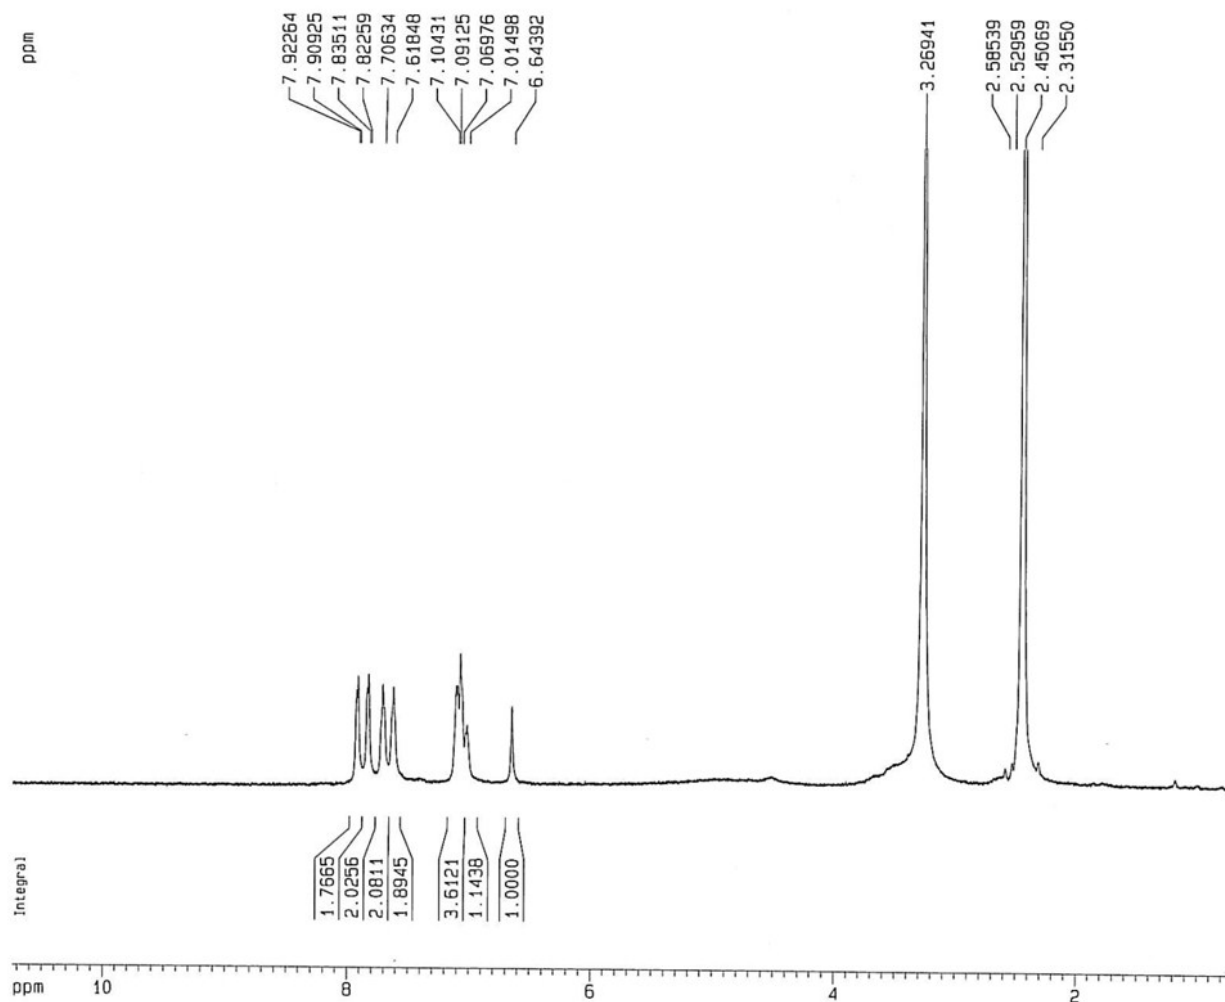



A-Asghari 1H NMR in DMSO at 298 K 93/6/22

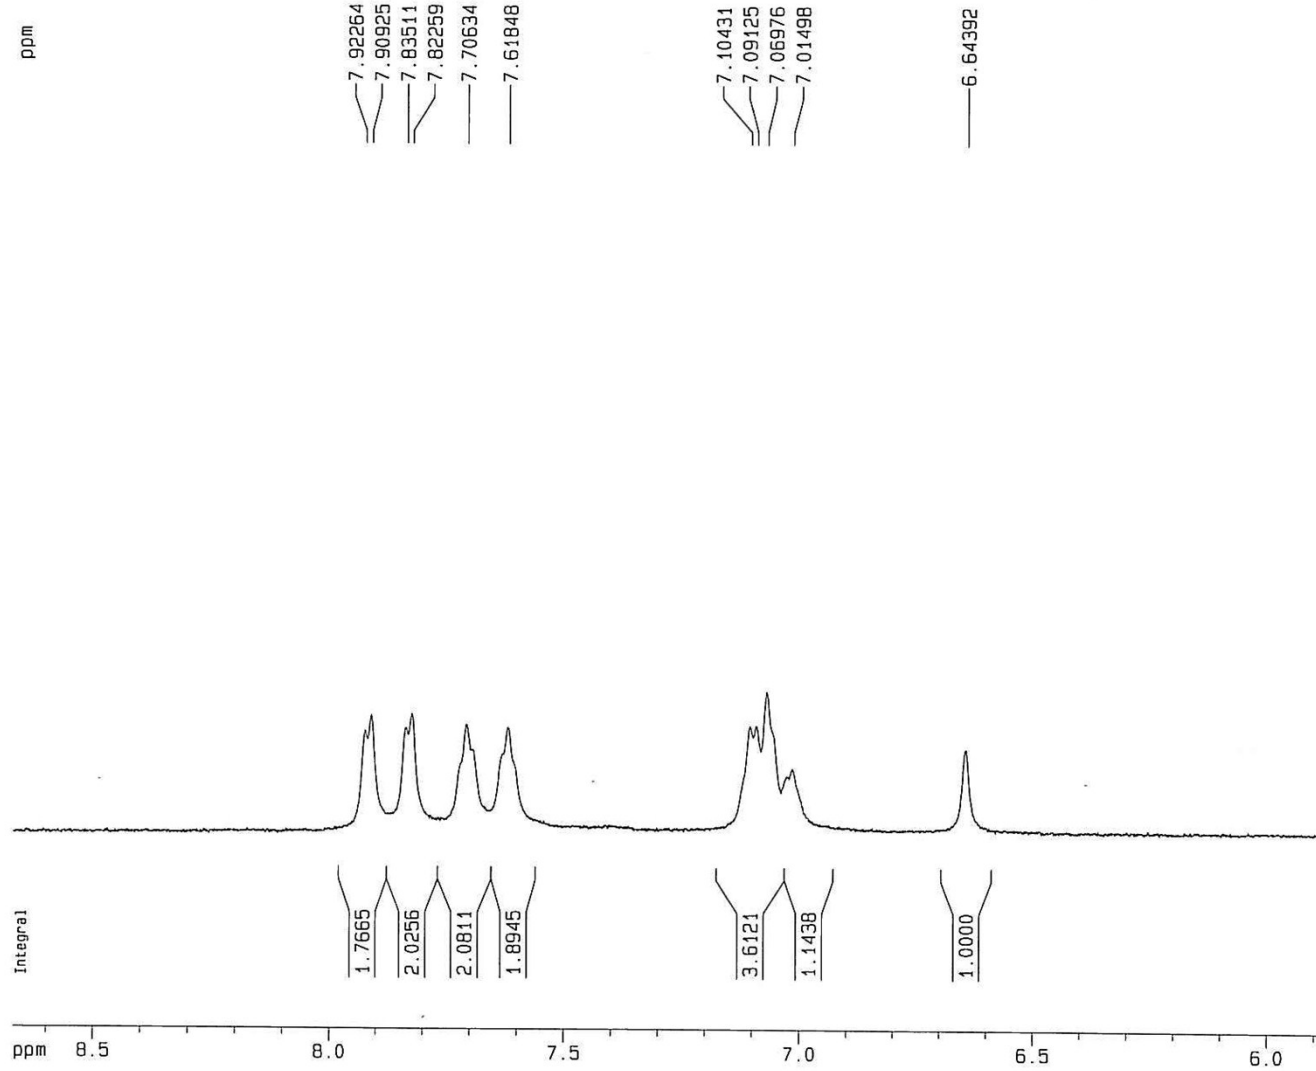

Current Data Parameters  
NAME Guest-1  
EXPNO 82  
PROCNO 1

F2 - Acquisition Parameters  
Date\_ 20140914  
Time 9.34  
INSTRUM spect  
PROBHD 5 mm QNP 1H/13  
PULPROG zg30  
TD 32768  
SOLVENT CDCl3  
NS 16  
DS 0  
SWH 10000.000 Hz  
FIDRES 0.305176 Hz  
AQ 1.6385000 sec  
RG 574.7  
DW 50.000 usec  
DE 6.50 usec  
TE 298.0 K  
D1 5.0000000 sec  
MCREST 0.0000000 sec  
MCWRK 0.0150000 sec

===== CHANNEL f1 =====  
NUC1 1H  
P1 10.50 usec  
PL1 -3.00 dB  
SF01 500.1330885 MHz

F2 - Processing parameters  
SI 32768  
SF 500.1300282 MHz  
WDW EM  
SSB 0  
LB 0.30 Hz  
GB 0  
PC 1.00

1D NMR plot parameters  
CX 20.00 cm  
CY 33.23 cm  
F1P 8.669 ppm  
F1 4335.56 Hz  
F2P 5.886 ppm  
F2 2943.84 Hz  
PPMCM 0.13914 ppm/cm  
HZCM 69.58583 Hz/cm

S<sub>7</sub> The <sup>1</sup>H NMR spectrum of 3,3'-  
 ((4-Chlorophenyl)methylene)bis(2-  
 hydroxynaphthalene-1,4-dione) in  
 DMSO-*d*<sub>6</sub> (**3b**)

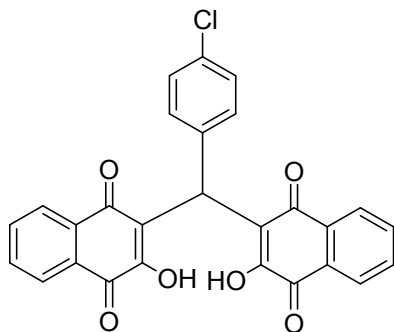

<sup>1</sup>H NMR (400 MHz, DMSO-*d*<sub>6</sub>): δ<sub>H</sub>  
 16.37 (br s, 2 Enolic OH), 7.99 (d, *J*  
 7.2 Hz, 2H), 7.90 (d, *J* 6.8 Hz, 2H),  
 7.78 (br t, 2H), 7.69 (br t, 2H), 7.22  
 (br d, 2H, Ar), 7.15 (br d, 2H, Ar),  
 6.68 (1H, s, Aliph. CH) ppm.

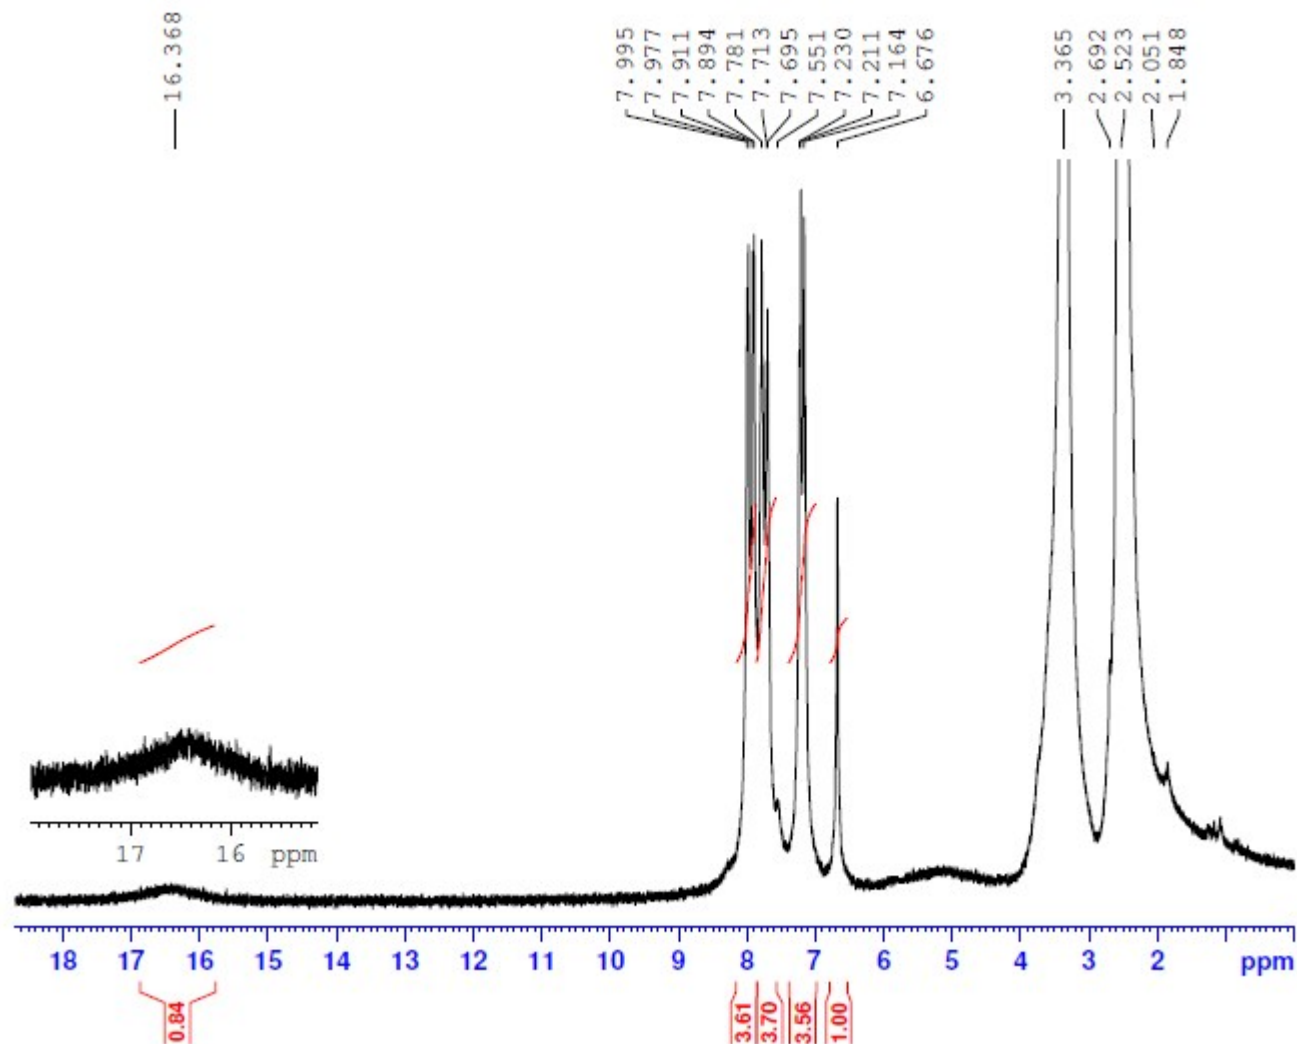

Sample code: 1 (haji)

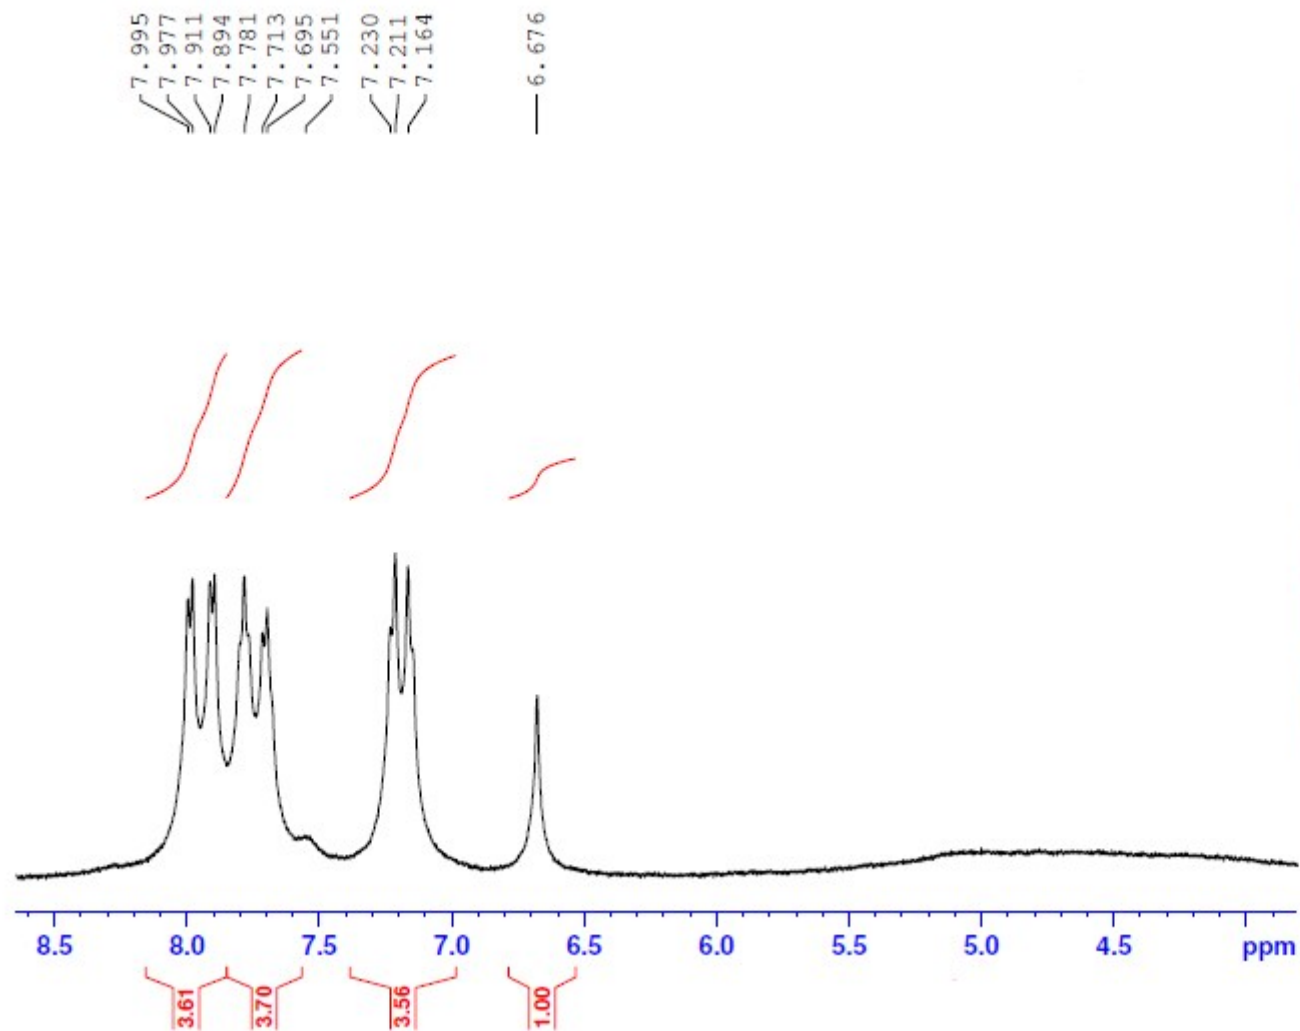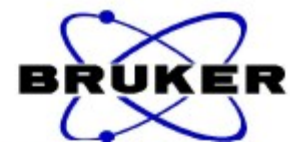

NAME Gilan UN  
EXPNO 1694  
PROCNO 1  
Date\_ 20141231  
Time 12.48  
INSTRUM spect  
PROBHD 5 mm PABBO BB-  
PULPROG zg30  
TD 65536  
SOLVENT DMSO  
NS 20  
DS 0  
SWH 8012.820 Hz  
FIDRES 0.122266 Hz  
AQ 4.0894966 sec  
RG 144  
DW 62.400 usec  
DE 6.50 usec  
TE 294.9 K  
D1 4.00000000 sec  
TD0 1

===== CHANNEL f1 =====  
NUC1 1H  
P1 14.00 usec  
PL1 -2.00 dB  
PL1W 11.86359406 W  
SFO1 400.2236020 MHz  
SI 32768  
SF 400.2200000 MHz  
WDW EM  
SSB 0  
LB 0.30 Hz  
GB 0  
PC 1.00

**S<sub>8</sub>** The <sup>1</sup>H NMR spectrum of 3,3'-((4-Hydroxyphenyl)methylene)bis(2-hydroxynaphthalene-1,4-dione) in DMSO-*d*<sub>6</sub> (**3c**)

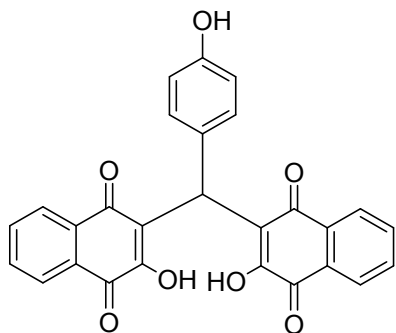

<sup>1</sup>H NMR (400 MHz, DMSO-*d*<sub>6</sub>): δ<sub>H</sub> 16.56 (br s, 2 Enolic OH), 7.97 (d, *J* 7.6 Hz, 2H), 7.88 (d, *J* 7.6 Hz, 2H), 7.77 (t, *J* 7.6 Hz, 2H), 7.68 (t, *J* 7.6 Hz, 2H), 6.90 (d, *J* 8.4 Hz, Ar), 6.58 (s, 1H, Phenolic OH), 6.56 (d, *J* 8.4 Hz, Ar), 6.58 (1H, s, Aliph. CH) ppm.

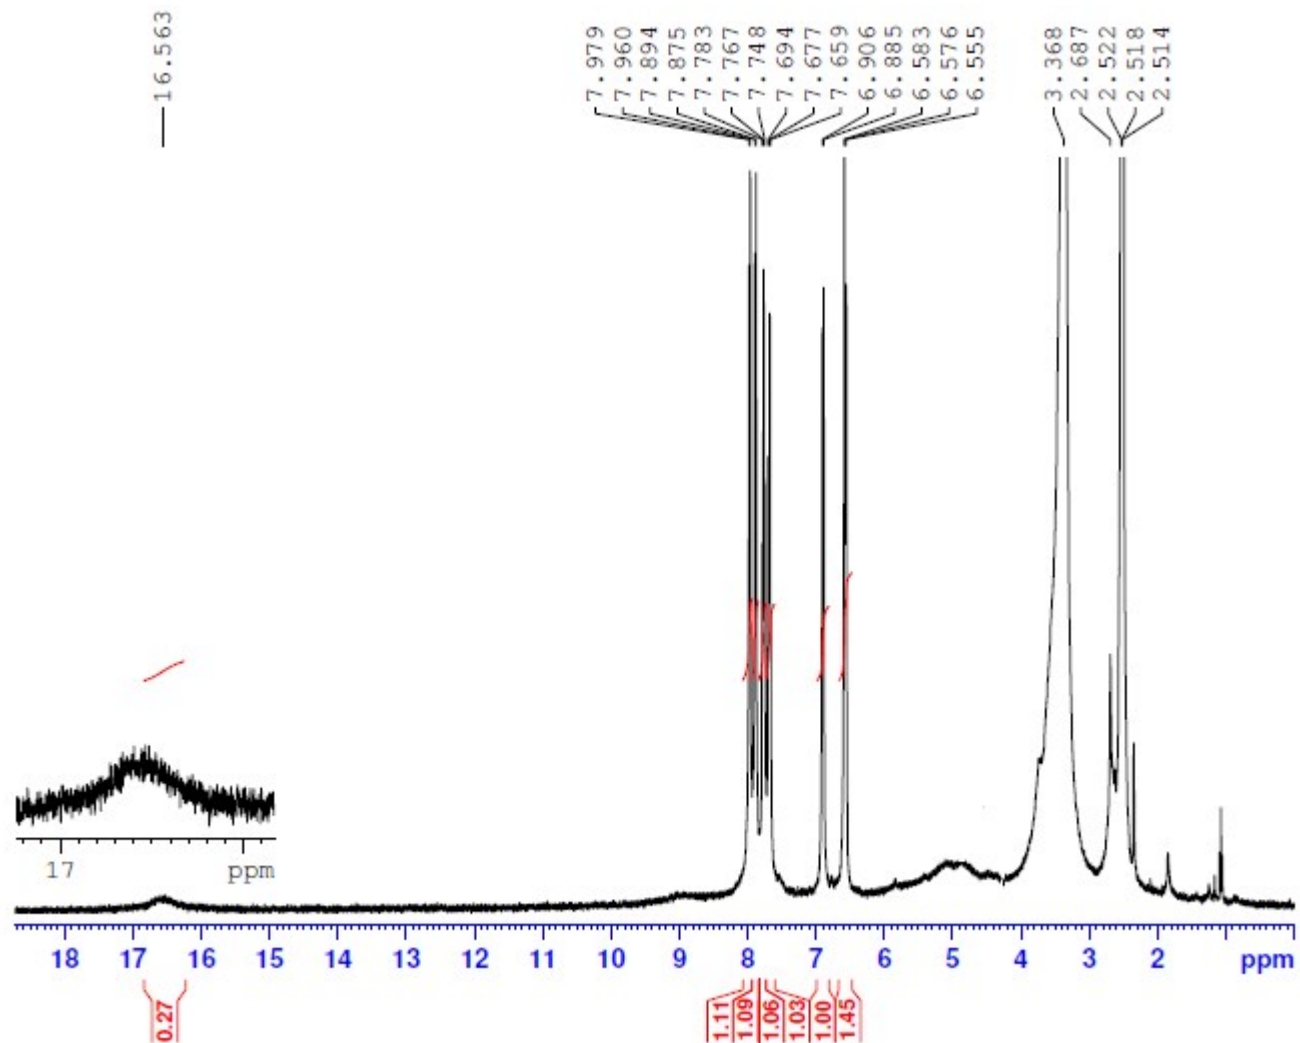

Sample code: C (haji)

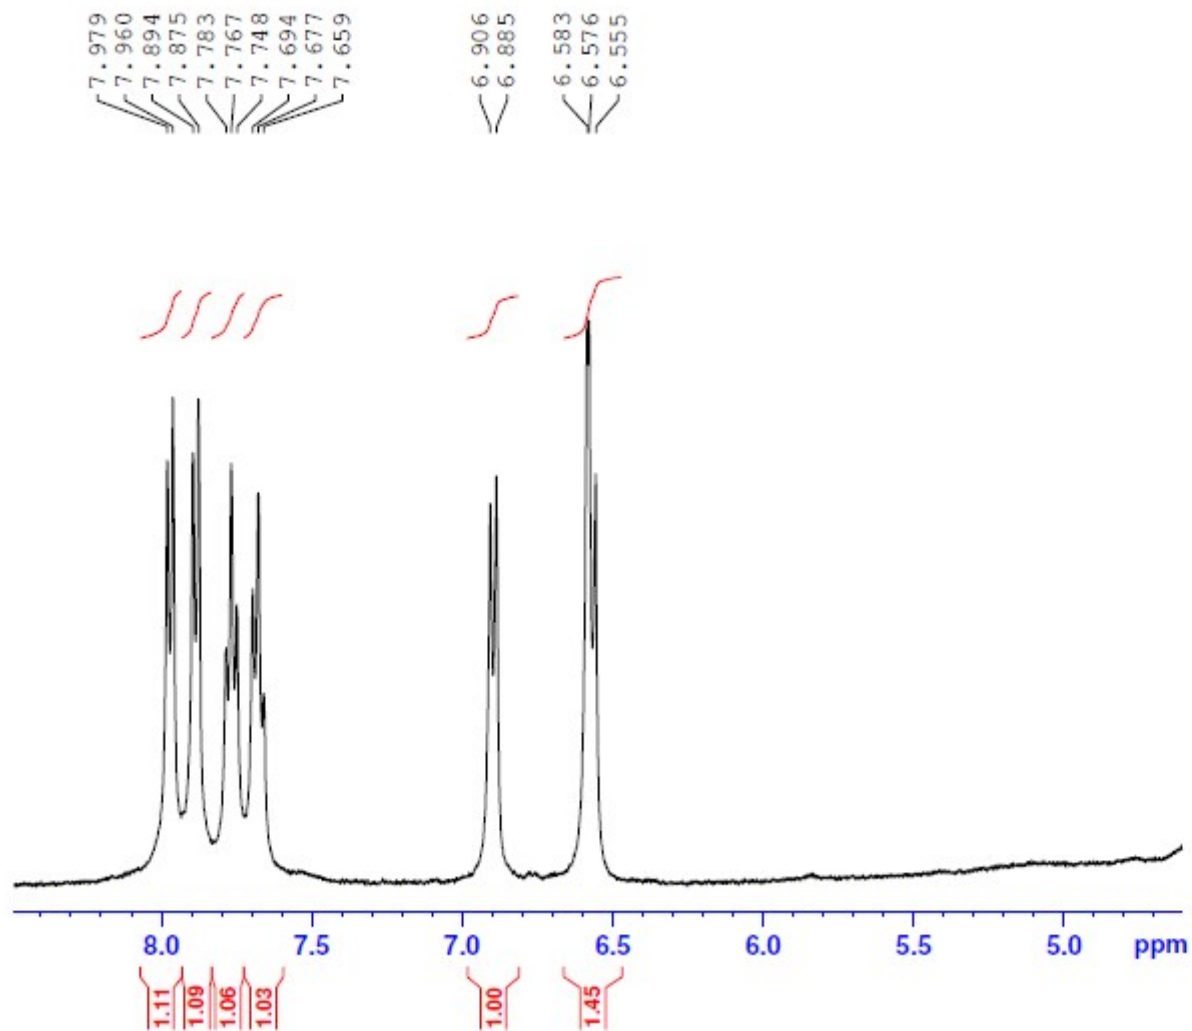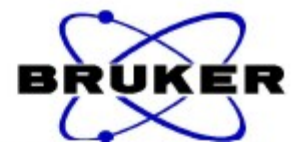

NAME Gilan UN  
EXPNO 1767  
PROCNO 1  
Date\_ 20150125  
Time 14.21  
INSTRUM spect  
PROBHD 5 mm PABBO BB-  
PULPROG zg30  
TD 65536  
SOLVENT DMSO  
NS 20  
DS 0  
SWH 8012.820 Hz  
FIDRES 0.122266 Hz  
AQ 4.0894966 sec  
RG 181  
DW 62.400 usec  
DE 6.50 usec  
TE 293.6 K  
D1 4.00000000 sec  
TD0 1

==== CHANNEL f1 =====  
NUC1 1H  
P1 14.00 usec  
PL1 -2.00 dB  
PL1W 11.86359406 W  
SFO1 400.2236020 MHz  
SI 32768  
SF 400.2200000 MHz  
WDW EM  
SSB 0  
LB 0.30 Hz  
GB 0  
PC 1.00

S<sub>9</sub> The <sup>1</sup>H NMR spectrum of 3,3'-((3-Methoxyphenyl)methylene)bis(2-hydroxynaphthalene-1,4-dione) in DMSO-*d*<sub>6</sub> (**3d**)

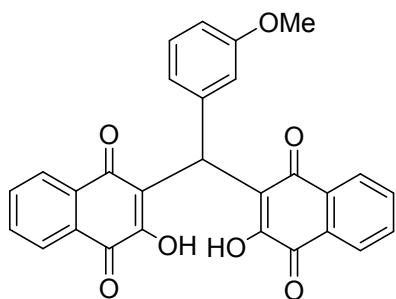

<sup>1</sup>H NMR (400 MHz, DMSO-*d*<sub>6</sub>): δ<sub>H</sub> 16.45 (br s, 2 Enolic OH), 7.98 (d, *J* 7.6 Hz, 2H), 7.89 (d, *J* 7.6 Hz, 2H), 7.77 (t, *J* 7.6 Hz, 2H), 7.68 (t, *J* 7.6 Hz, 2H), 7.09 (t, *J* 8.0 Hz, 1H, Ar 5-H), 6.72-6.64 (m, 3H, Ar), 3.64 (s, 3H, OCH<sub>3</sub>), 6.66 (s, 1H, Aliph. CH) ppm.

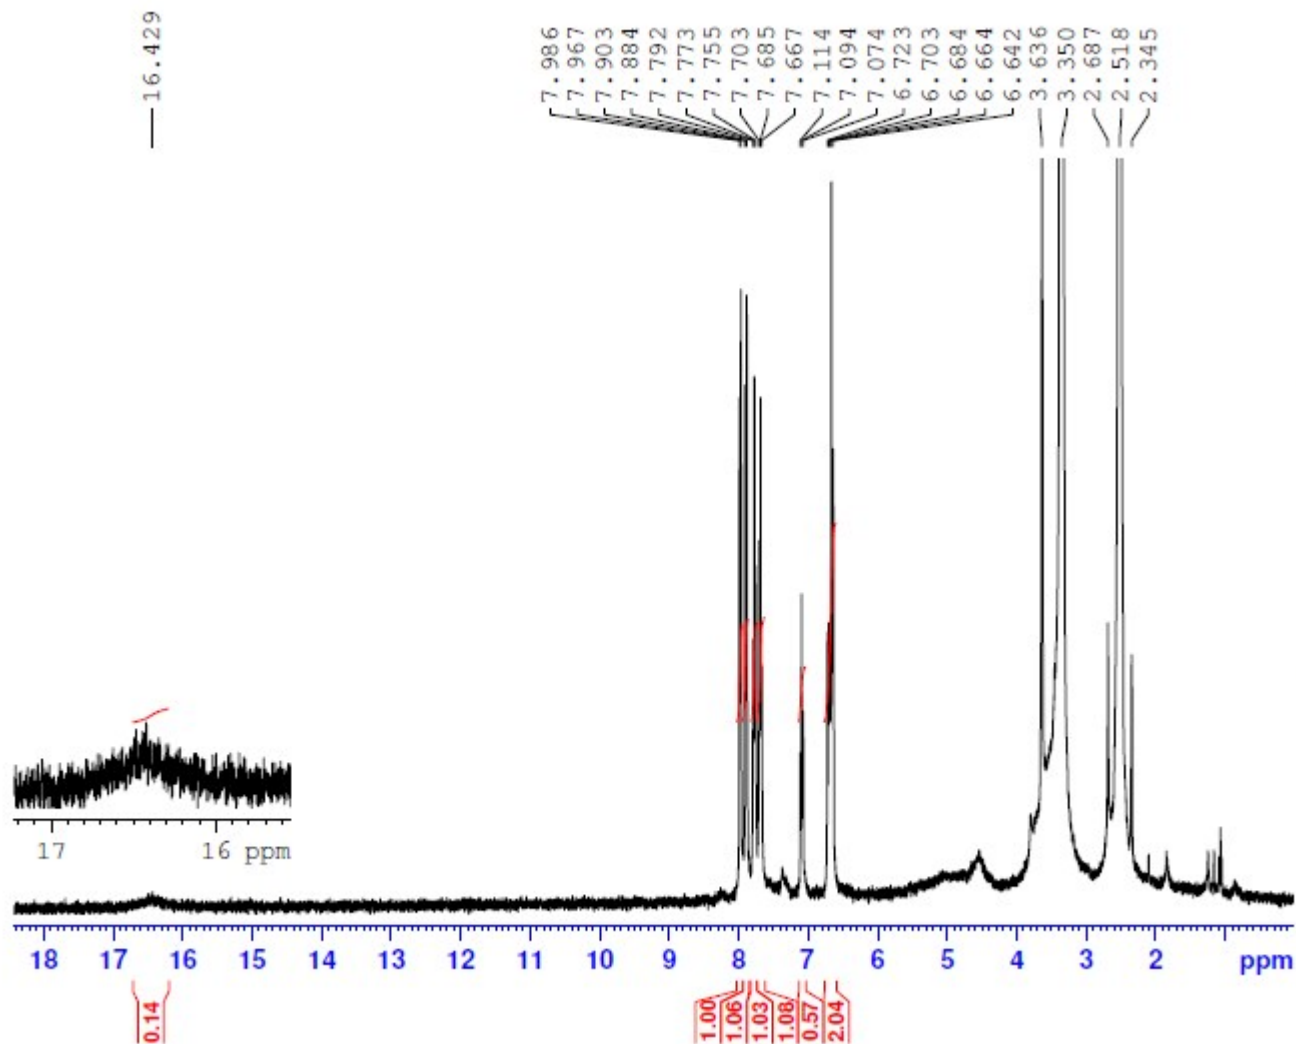

Sample code: D (haji)

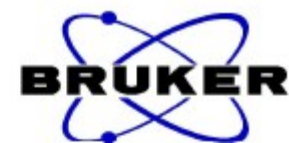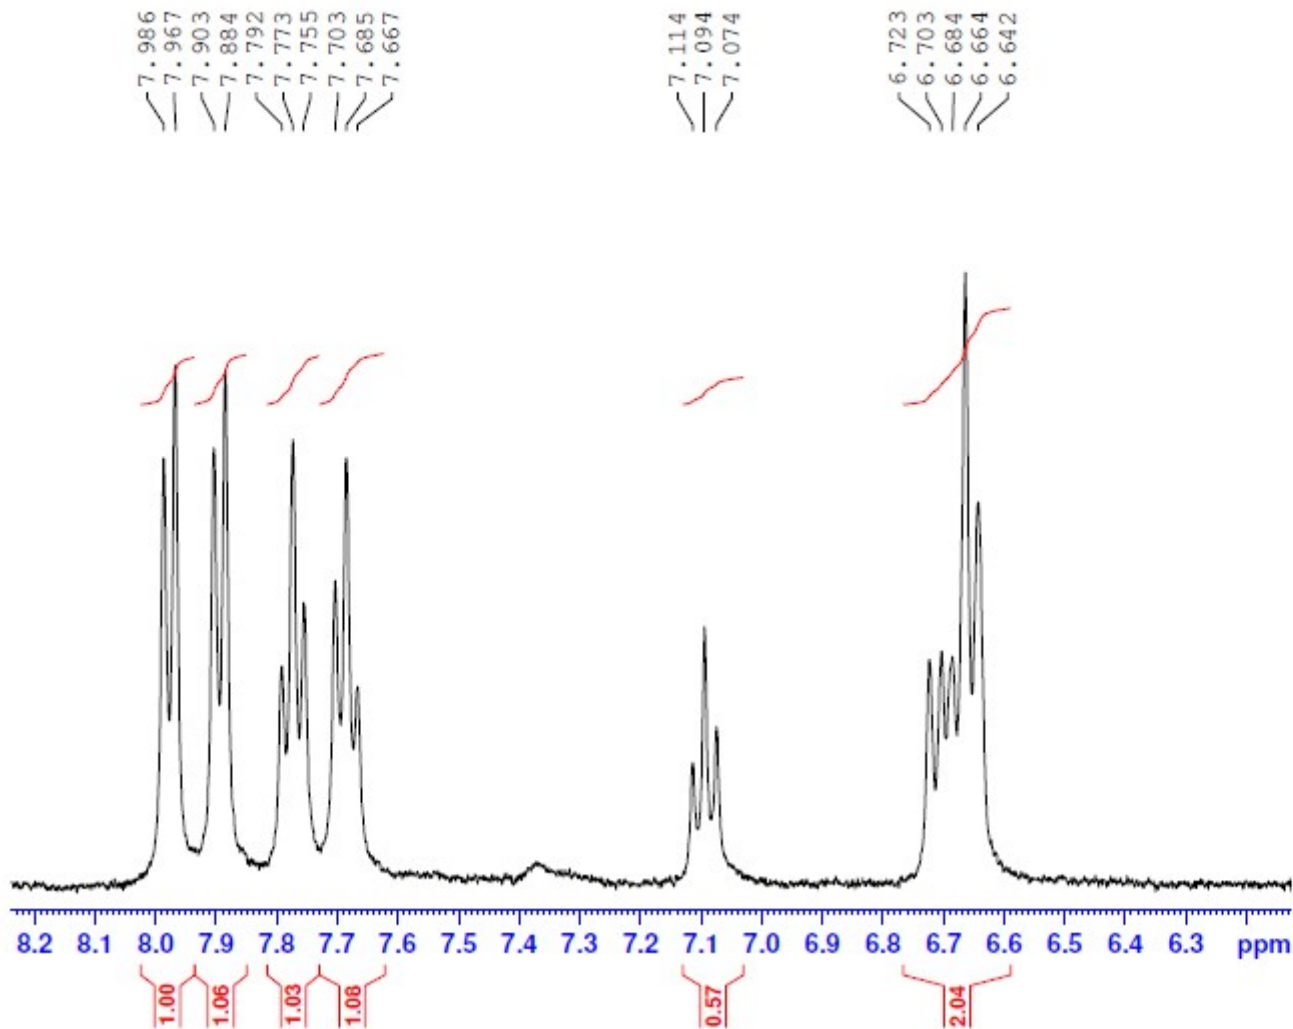

```
NAME          Gilan UN
EXPNO         1768
PROCNO        1
Date_         20150125
Time          14.28
INSTRUM       spect
PROBHD        5 mm PABBO BB-
PULPROG       zg30
TD            65536
SOLVENT       DMSO
NS            20
DS            0
SWH           8012.820 Hz
FIDRES        0.122266 Hz
AQ            4.0894966 sec
RG            181
DW            62.400 usec
DE            6.50 usec
TE            293.5 K
D1            4.0000000 sec
TDO           1
```

```
===== CHANNEL f1 =====
NUC1           1H
P1             14.00 usec
PL1            -2.00 dB
PL1W           11.86359406 W
SFO1           400.2236020 MHz
SI             32768
SF             400.2200000 MHz
WDW            EM
SSB            0
LB             0.30 Hz
GB             0
PC             1.00
```

S<sub>10</sub> The <sup>1</sup>H NMR spectrum of 3,3'-  
 ((4-Nitrophenyl)methylene)bis(2-  
 hydroxynaphthalene-1,4-dione) in  
 DMSO-*d*<sub>6</sub> (**3e**)

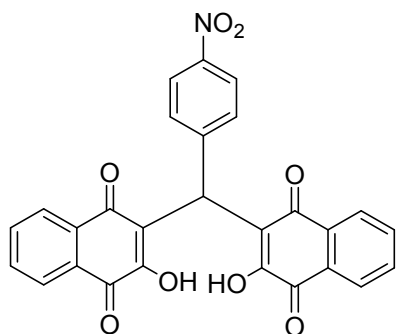

<sup>1</sup>H NMR (400 MHz, DMSO-*d*<sub>6</sub>): δ<sub>H</sub>  
 16.18 (br s, 2 Enolic OH), 8.06 (d, *J*  
 8.6 Hz, 2H, Ar), 7.99 (d, *J* 7.2 Hz, 2H),  
 7.91 (d, *J* 7.6 Hz, 2H), 7.79 (t, *J* 7.4  
 Hz, 2H), 7.71 (t, *J* 7.2 Hz, 2H), 7.43  
 (d, *J* 8.6 Hz, 2H, Ar), 6.79 (s, 1H,  
 Aliph. CH) ppm.

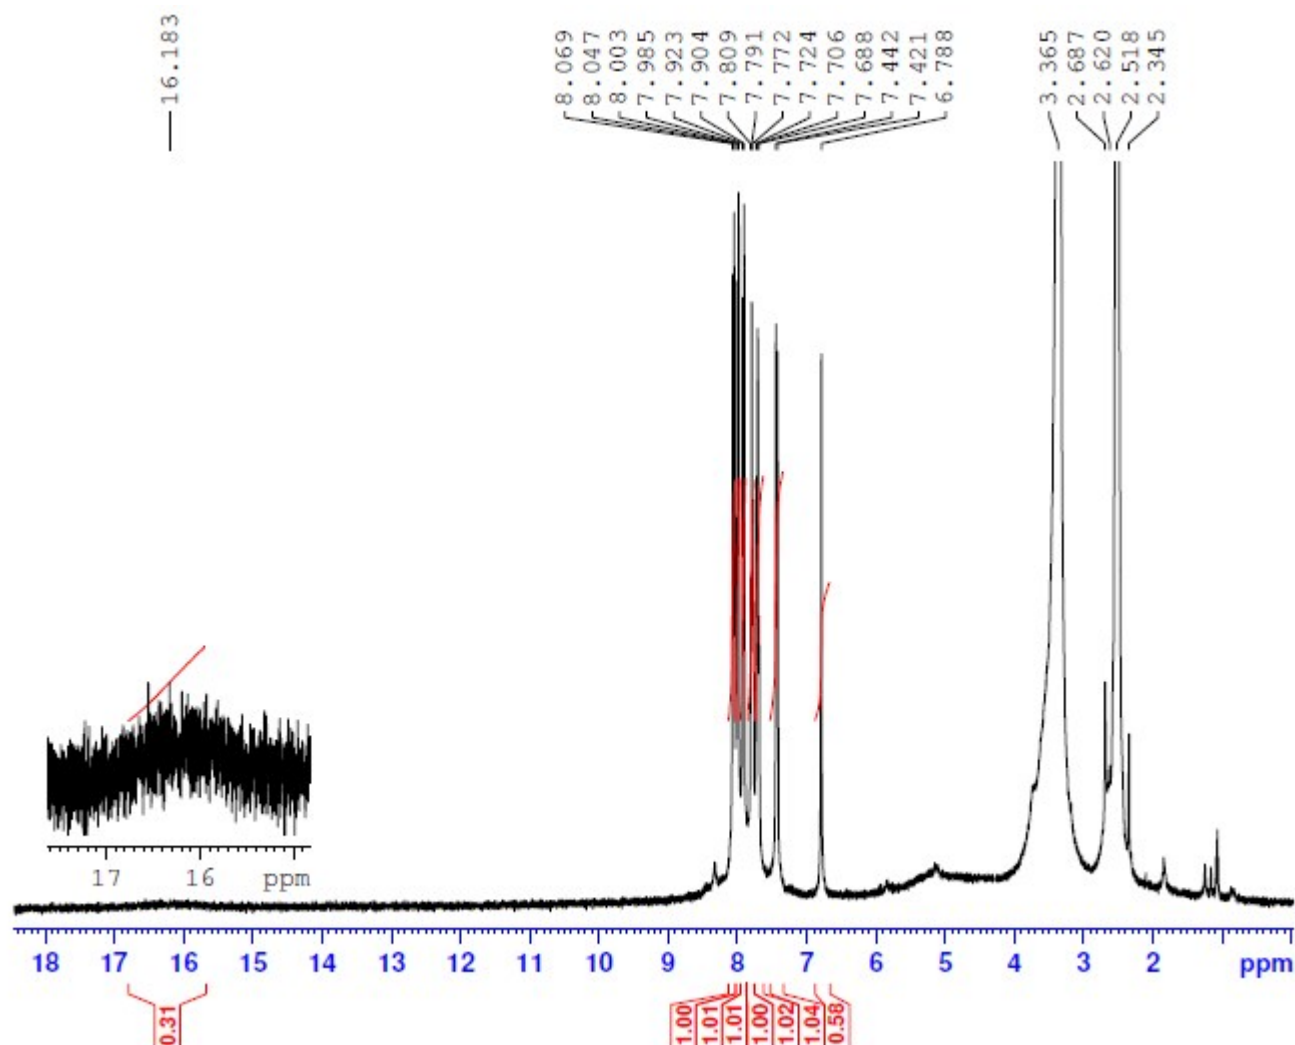



Sample code: E (haji)

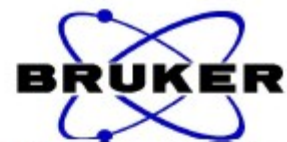

NAME Gilan UN  
EXPNO 1769  
PROCNO 1  
Date\_ 20150125  
Time 14.37  
INSTRUM spect  
PROBHD 5 mm PABBO BH-  
PULPROG zg30  
TD 65536  
SOLVENT DMSO  
NS 20  
DS 0  
SWH 8012.820 Hz  
FIDRES 0.122266 Hz  
AQ 4.0894966 sec  
RG 181  
DW 62.400 usec  
DE 6.50 usec  
TE 293.5 K  
D1 4.00000000 sec  
TDO 1

===== CHANNEL f1 =====  
NUC1 1H  
P1 14.00 usec  
PL1 -2.00 dB  
PL1W 11.86359406 W  
SFO1 400.2236020 MHz  
SI 32768  
SF 400.2200000 MHz  
WDW EM  
SSB 0  
LB 0.30 Hz  
GB 0  
PC 1.00

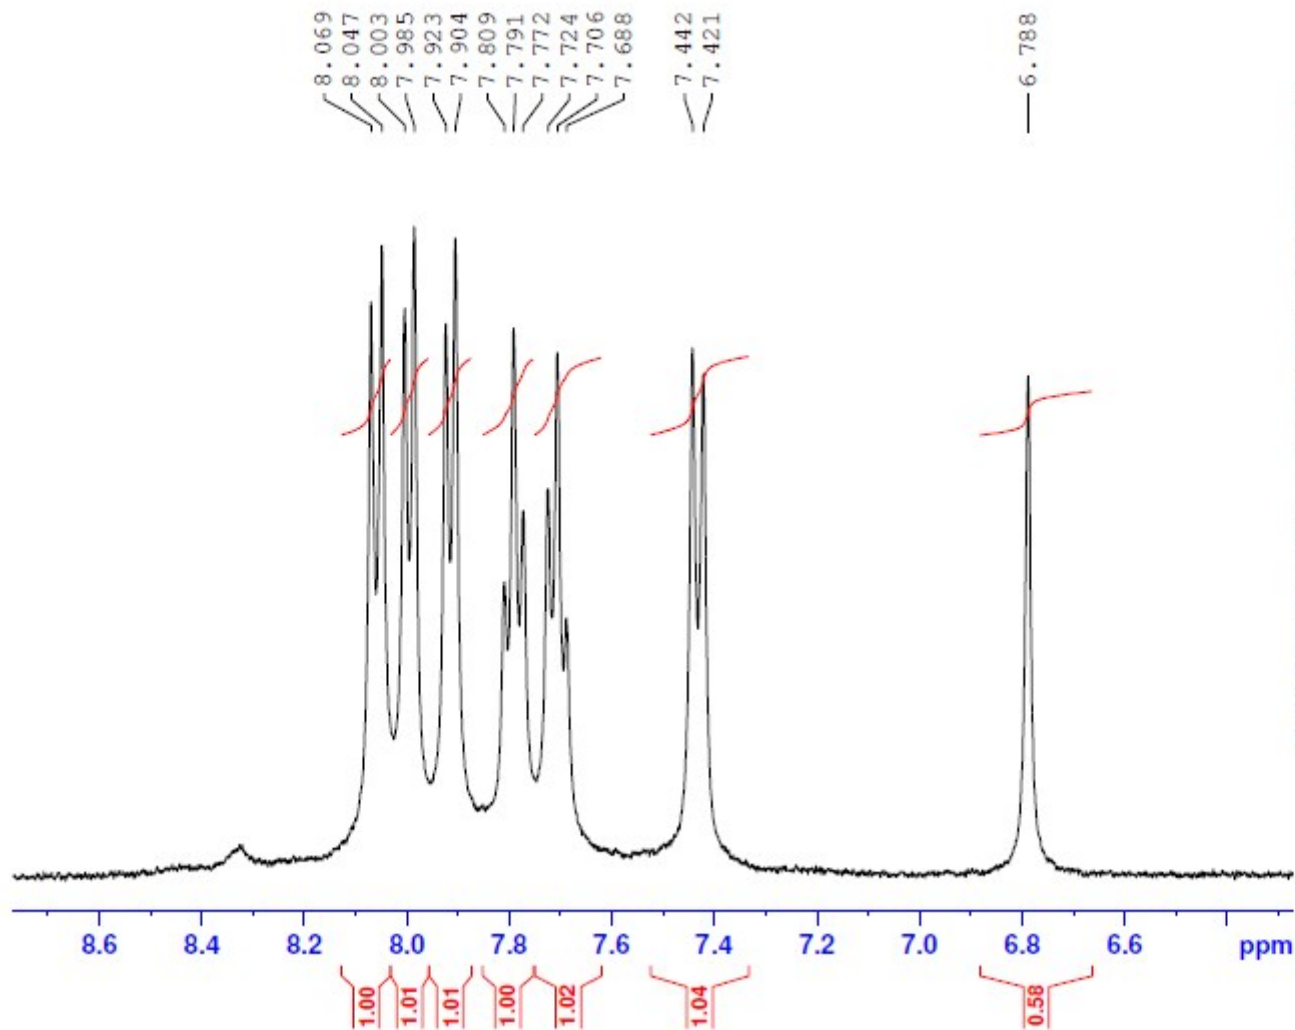

S<sub>11</sub> The <sup>1</sup>H NMR spectrum of 3,3'-  
 ((4-Methylphenyl)methylene)bis(2-  
 hydroxynaphthalene-1,4-dione) in  
 DMSO-*d*<sub>6</sub> (**3f**)

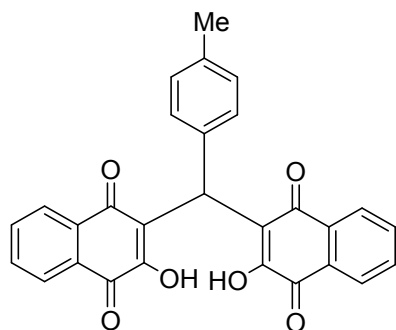

<sup>1</sup>H NMR (400 MHz, DMSO-*d*<sub>6</sub>): δ<sub>H</sub>  
 16.45 (br s, 2 Enolic OH), 7.97-6.99  
 (m, 12H), 6.65 (s, 1H, Aliph. CH), 2.23  
 (s, 3H, CH<sub>3</sub>) ppm.

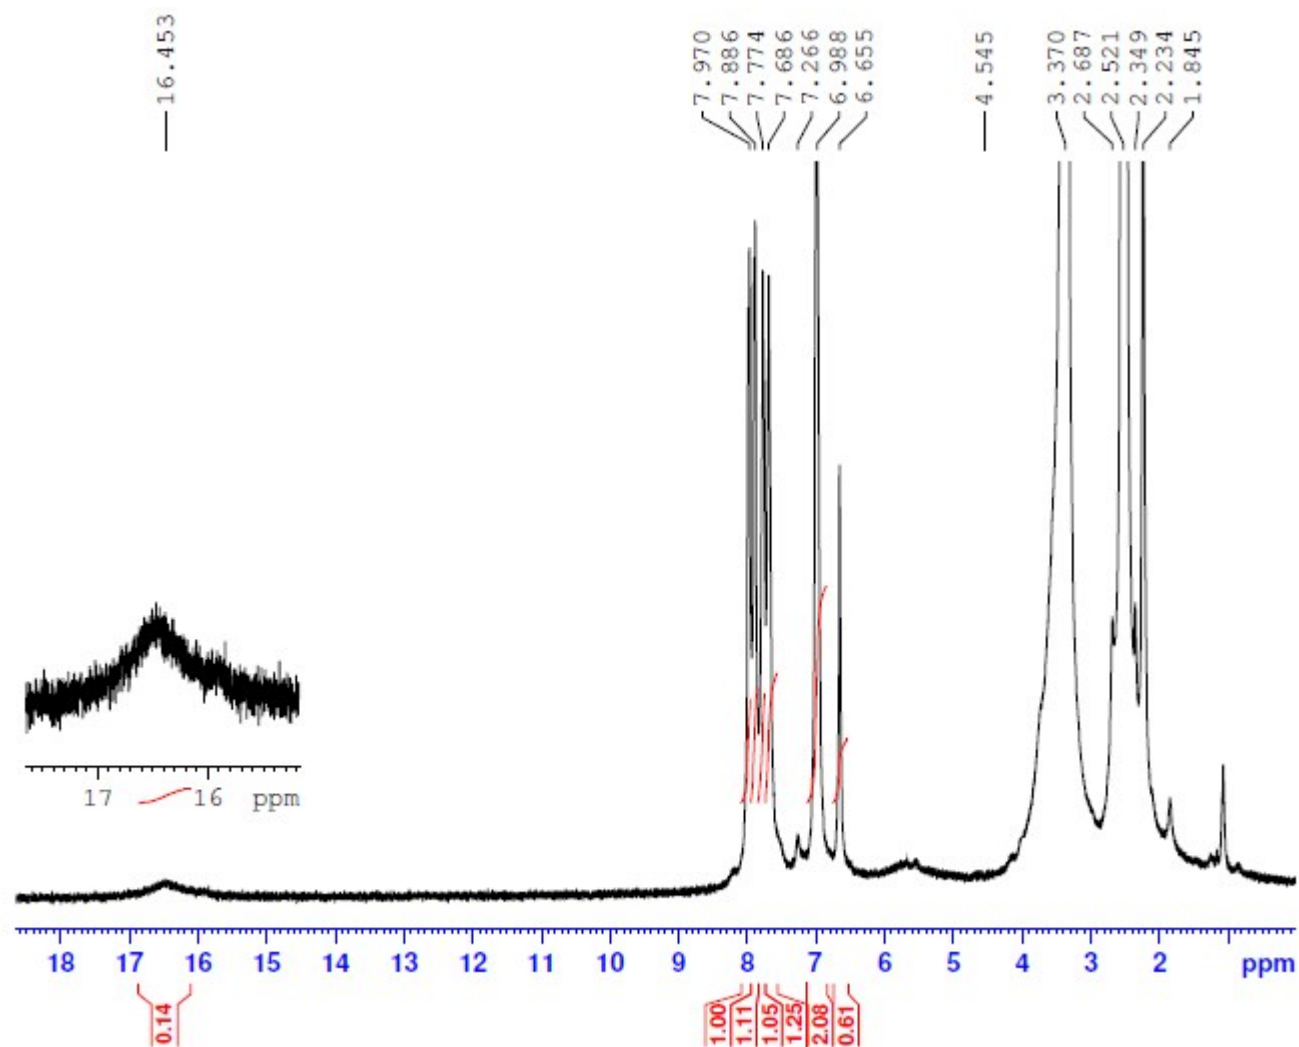

Sample code: F (haji)

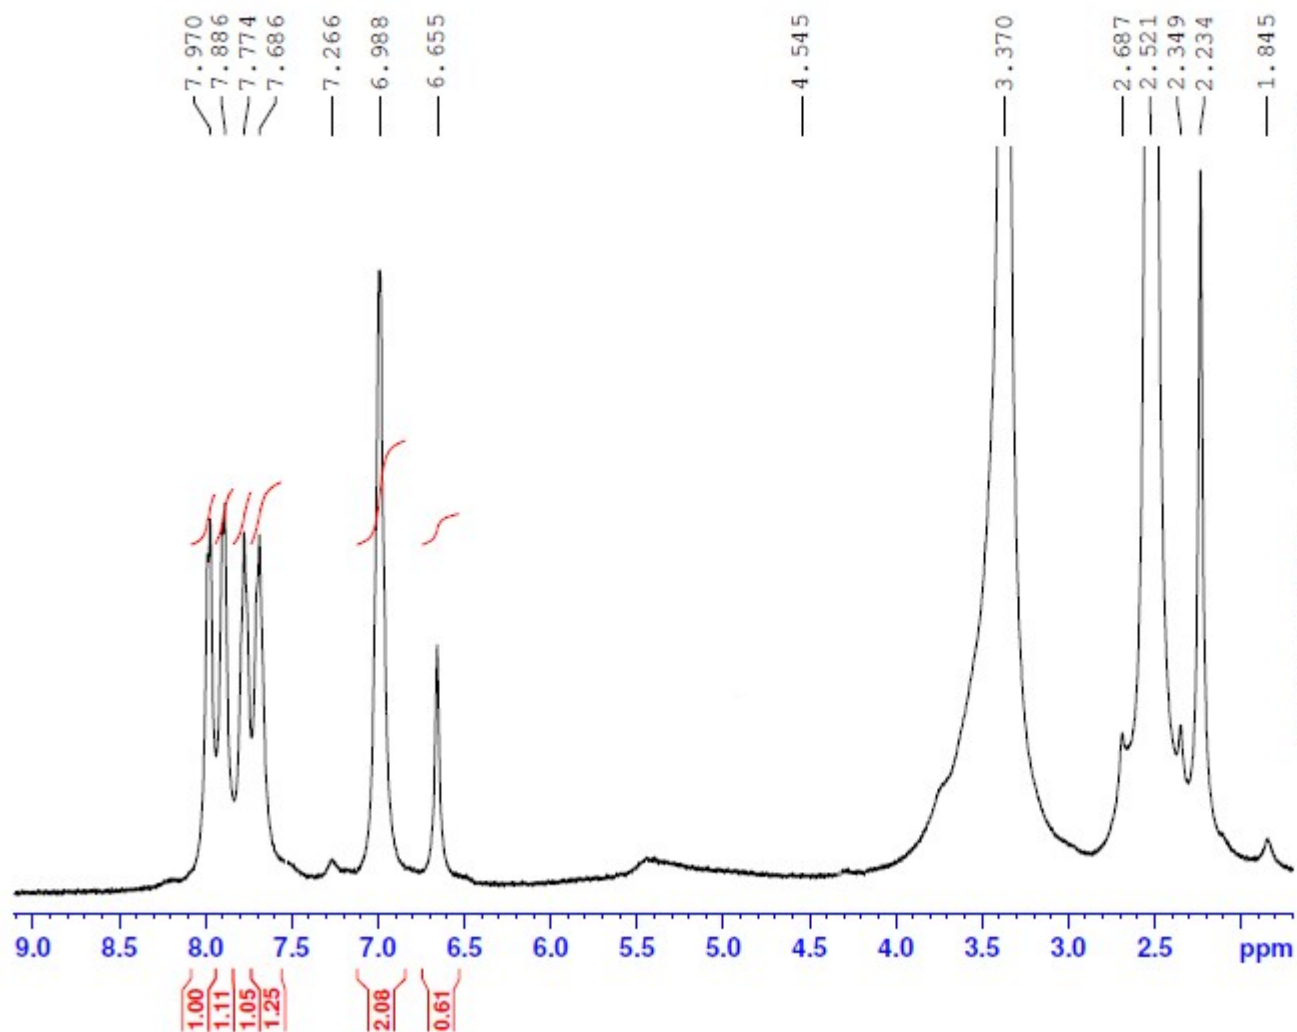

**BRUKER**

|         |                |
|---------|----------------|
| NAME    | Gilan UN       |
| EXPNO   | 1770           |
| PROCNO  | 1              |
| Date_   | 20150125       |
| Time    | 14.42          |
| INSTRUM | spect          |
| PROBHD  | 5 mm PABBO BB- |
| PULPROG | zg30           |
| TD      | 65536          |
| SOLVENT | DMSO           |
| NS      | 20             |
| DS      | 0              |
| SWH     | 8012.820 Hz    |
| FIDRES  | 0.122266 Hz    |
| AQ      | 4.0894966 sec  |
| RG      | 181            |
| DW      | 62.400 usec    |
| DE      | 6.50 usec      |
| TE      | 293.5 K        |
| D1      | 4.00000000 sec |
| TDO     | 1              |

==== CHANNEL f1 =====

|      |                 |
|------|-----------------|
| NUC1 | 1H              |
| P1   | 14.00 usec      |
| PL1  | -2.00 dB        |
| PLW  | 11.86359406 W   |
| SFO1 | 400.2236020 MHz |
| SI   | 32768           |
| SF   | 400.2200000 MHz |
| WDW  | EM              |
| SSB  | 0               |
| LB   | 0.30 Hz         |
| GB   | 0               |
| PC   | 1.00            |

S<sub>12</sub> The <sup>1</sup>H NMR spectrum of 3,3'-((3-Bromophenyl)methylene)bis(2-hydroxynaphthalene-1,4-dione) in DMSO-*d*<sub>6</sub> (**3g**)

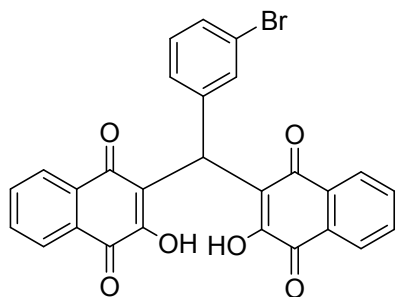

<sup>1</sup>H NMR (400 MHz, DMSO-*d*<sub>6</sub>): δ<sub>H</sub> 16.38 (br s, 2 Enolic OH), 7.98-7.70 (m, 8H), 7.30-7.16 (m, 4H, Ar), 6.70 (s, 1H, Aliph. CH) ppm.

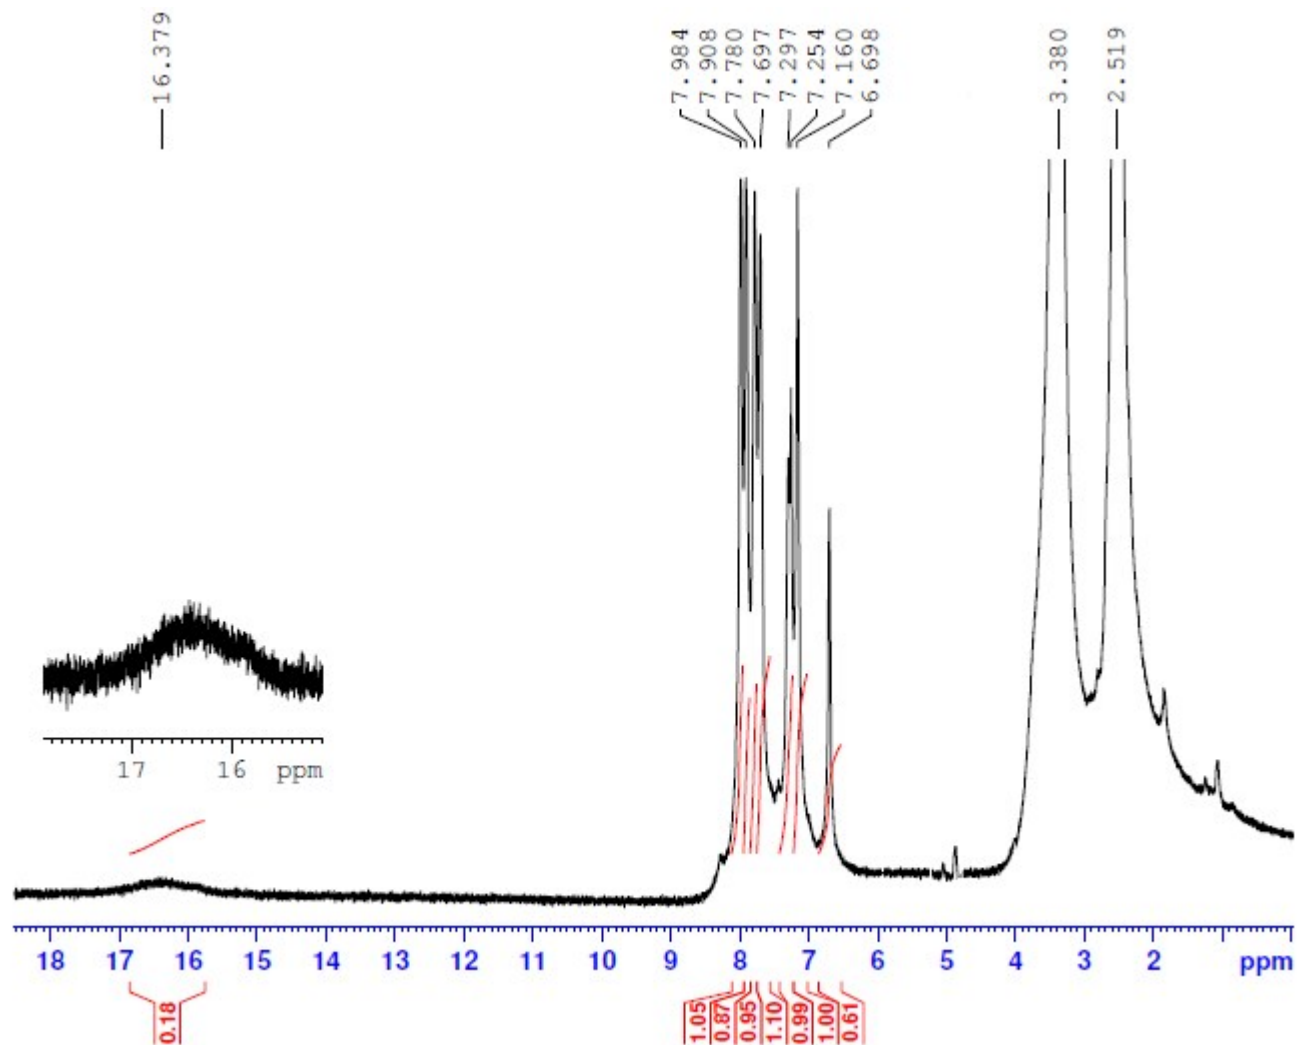

Sample code: G (haji)

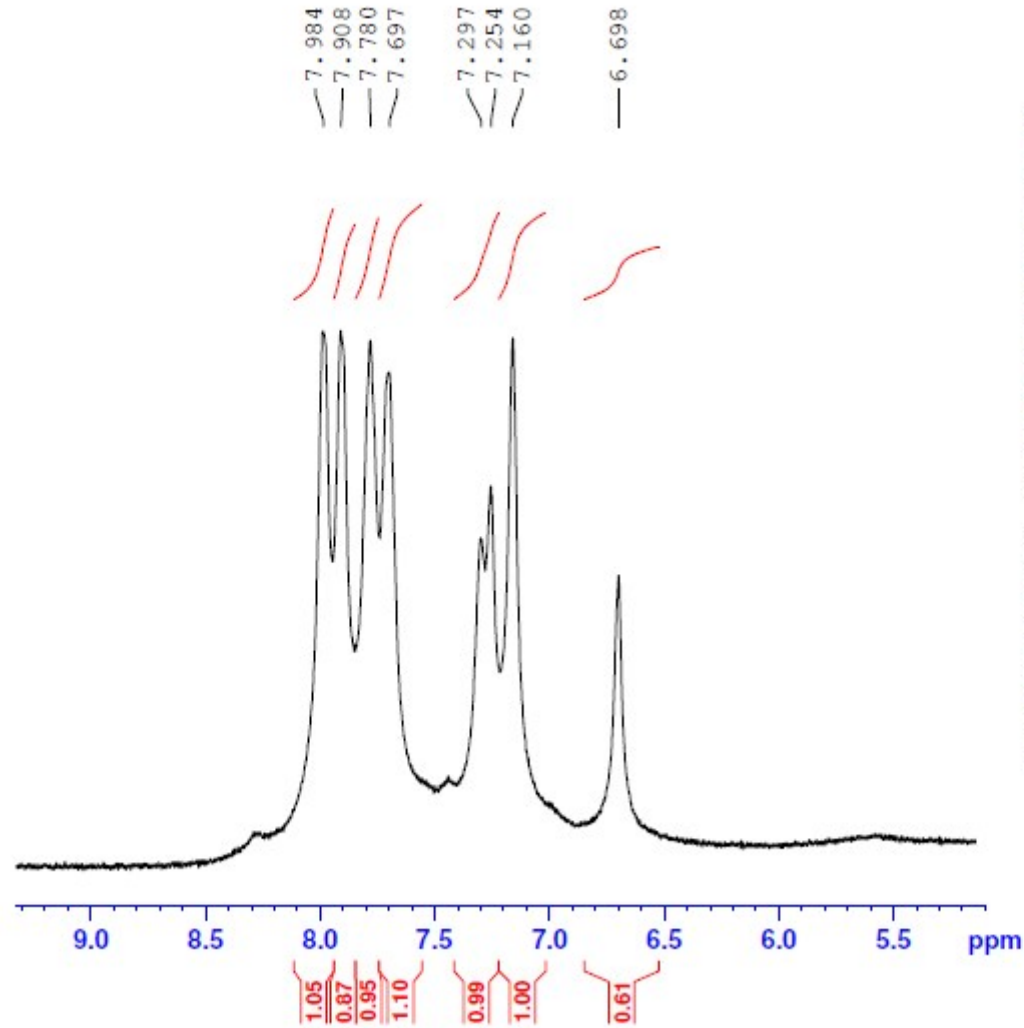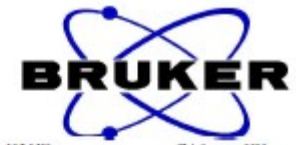

NAME Gilan UN  
EXPNO 1771  
PROCNO 1  
Date\_ 20150125  
Time 14.49  
INSTRUM spect  
PROBHD 5 mm PABBO BB-  
PULPROG zg30  
TD 65536  
SOLVENT DMSO  
NS 20  
DS 0  
SWH 8012.820 Hz  
FIDRES 0.122266 Hz  
AQ 4.0894966 sec  
RG 181  
DW 62.400 usec  
DE 6.50 usec  
TE 293.6 K  
D1 4.0000000 sec  
TDO 1

==== CHANNEL f1 =====  
NUC1 1H  
P1 14.00 usec  
PL1 -2.00 dB  
PL1W 11.86359406 W  
SFO1 400.2236020 MHz  
SI 32768  
SF 400.2200000 MHz  
WDW EM  
SSB 0  
LB 0.30 Hz  
GB 0  
PC 1.00

**S<sub>13</sub>** The <sup>1</sup>H NMR spectrum of 3,3'-((4-chlorophenyl)methylene)bis(2-hydroxynaphthalene-1,4-dione) in DMSO-*d*<sub>6</sub> (**3h**)

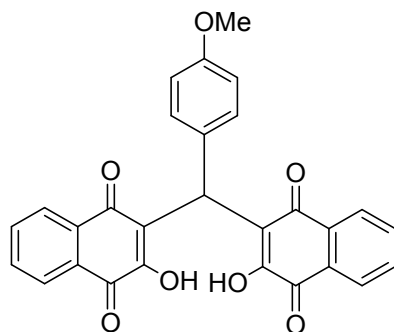

<sup>1</sup>H NMR (400 MHz, DMSO-*d*<sub>6</sub>): δ<sub>H</sub> 16.43 (br s, 2 Enolic OH), 7.97 (d, *J* 7.6 Hz, 2H), 7.89 (d, *J* 7.2 Hz, 2H), 7.77 (t, *J* 7.4 Hz, 2H), 7.68 (t, *J* 7.4 Hz, 2H), 7.02 (d, *J* 8.4 Hz, 2H, Ar), 6.74 (d, *J* 8.4 Hz, 2H, Ar), 6.62 s, 1H, Aliph. CH), 3.69 (s, 3H, OCH<sub>3</sub>) ppm.

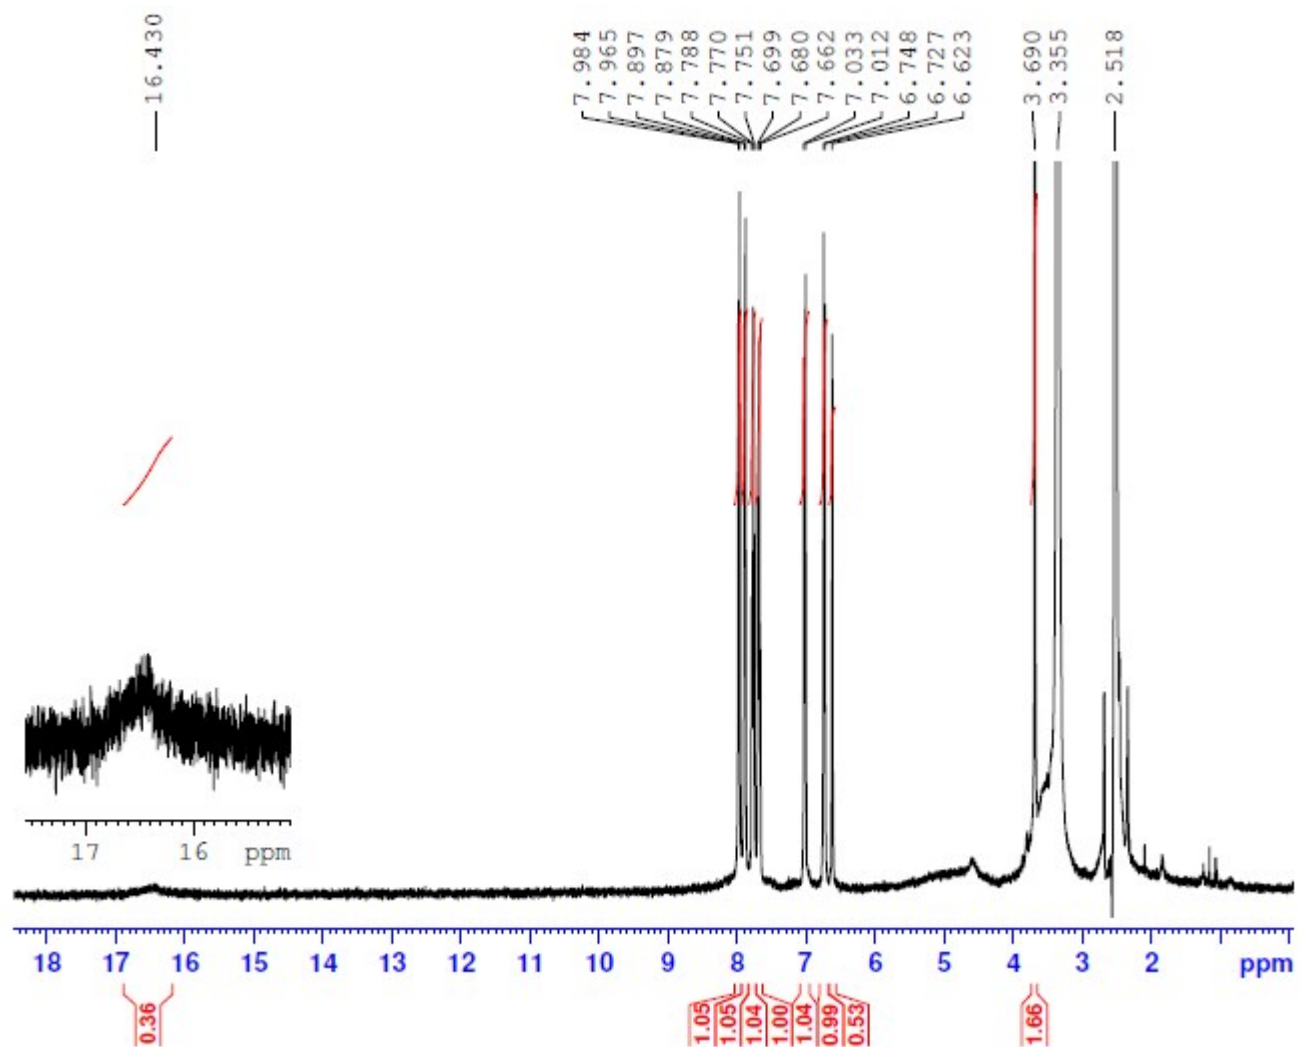

Sample code: H (haji)

7.984  
7.965  
7.897  
7.879  
7.788  
7.770  
7.751  
7.699  
7.680  
7.662

7.033  
7.012

6.748  
6.727  
6.623

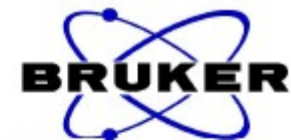

NAME Gilan UN  
EXPNO 1772  
PROCNO 1  
Date\_ 20150125  
Time 14.55  
INSTRUM spect  
PROBHD 5 mm PABBO BB-  
PULPROG zg30  
TD 65536  
SOLVENT DMSO  
NS 20  
DS 0  
SWH 8012.820 Hz  
FIDRES 0.122266 Hz  
AQ 4.0894966 sec  
RG 181  
DW 62.400 usec  
DE 6.50 usec  
TE 293.6 K  
D1 4.0000000 sec  
TD0 1

==== CHANNEL f1 =====  
NUC1 1H  
P1 14.00 usec  
PL1 -2.00 dB  
PL1W 11.86359406 W  
SFO1 400.2236020 MHz  
S1 32768  
SF 400.2200000 MHz  
WDW EM  
SSB 0  
LB 0.30 Hz  
GB 0  
PC 1.00

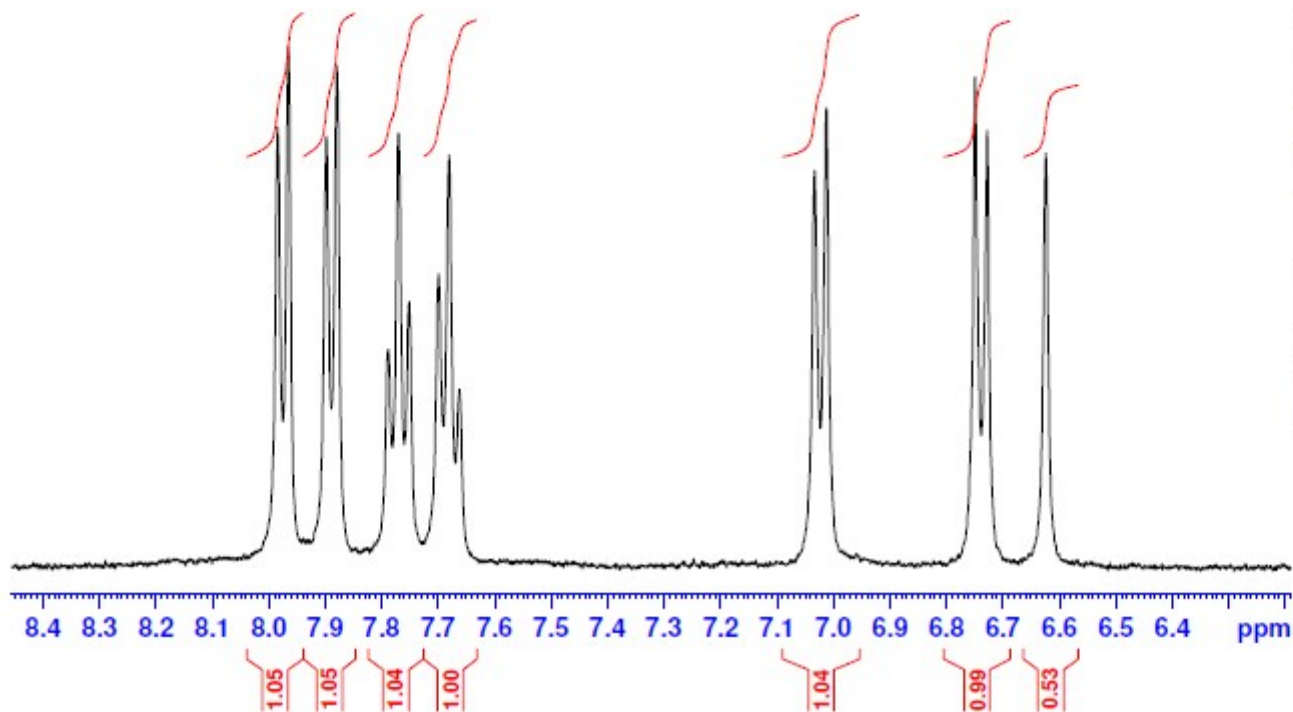

Supplement: c5ra26580k1.pdf [file c5ra26580k1.pdf]
